# Supplementary material for: Vulnerability of benthic trait diversity across the Mediterranean Sea following mass mortality events
Source: Nat Commun. 2025 Feb 12;16:1571. doi: 10.1038/s41467-025-55949-0 (PMC11821827; doi:10.1038/s41467-025-55949-0)
Supplement: Supplementary file 4 — Supplementary Data 1 [file 41467_2025_55949_MOESM4_ESM.xlsx]

## Sheet: Sup. Data 1
Model	Family used	R2 Estimate	R2 Estimate Error	R2 CI – 2,5%	R2 CI – 97,5%	Rhat	Trait Category	Estimate	Estimate Error	CI – 2,5%	CI – 97,5%
(1) Feeding	Beta	0.63	0.007	0.615	0.643	1	No, autotroph	0.109	0.233	0	0.343
							Active filter feeders with cilia	0.113	0.236	0	0.349
							Active filter feeders by pumping	0.835	0.274	0.561	1
							Passive filter feeders	0.478	0.373	0.106	0.851
							Herbivores / Grazers	0.109	0.232	0	0.341
							Carnivores	0.103	0.226	0	0.329
							Detritivores	0.104	0.228	0	0.332
(2) Maximum longevity	Beta	0.608	0.006	0.597	0.619	1	< 1 - 1 year	0.102	0.225	0	0.327
							2 - 5 years	0.1	0.221	0	0.321
							5 - 10 years	0.099	0.22	0	0.319
							10 - 20 years	0.15	0.264	0	0.414
							> 20 years	0.798	0.296	0.502	1
(3) Coloniality	Beta	0.63	0.012	0.4	0.88	1	Solitary	0.688	0.388	0.3	1
							Colonial/Modular	0.502	0.419	0.083	0.92
(4) Morphological form	Beta	0.577	0.008	0.561	0.592	1	Encrusting	0.117	0.246	0	0.363
							Filamentous	0.113	0.242	0	0.355
							Articulated	0.117	0.244	0	0.361
							Cup-like	0.13	0.258	0	0.388
							Massive encrusting	0.154	0.277	0	0.431
							Massive hemispheric	0.834	0.284	0.55	1
							Massive-erect	0.506	0.383	0.123	0.889
							Tree-like	0.093	0.21	0	0.303
(5) Carbon storage	Beta	0.721	0.005	0.71	0.73	1	Yes	0.089	0.205	0	0.294
							Potentially / Under discussions	0.763	0.308	0.455	1
							No	0.106	0.231	0	0.337
(6) Energetic resources	Beta	0.62	0.007	0.605	0.632	1	Photosynthetic autotroph	0.131	0.251	0	0.382
							Photo-heterotroph	0.78	0.31	0.47	1
							Heterotroph	0.102	0.224	0	0.326
(7) Size (Height)	Beta	0.578	0.006	0.565	0.589	1	Very small	0.107	0.23	0	0.337
							Small	0.122	0.243	0	0.365
							Medium	0.123	0.246	0	0.368
							Large	0.157	0.271	0	0.428
							Very large	0.83	0.279	0.551	1
(8) Growth rates	Beta	0.638	0.006	0.626	0.648	1	Extreme slow	0.104	0.223	0	0.327
							Slow	0.807	0.288	0.52	1
							Moderate	0.131	0.245	0	0.376
							High	0.095	0.213	0	0.309
							Very high	0.094	0.212	0	0.306
(9) Calcification	Beta	0.543	0.01	0.523	0.561	1	Without calcareous structures	0.13	0.263	0	0.393
							With calcareous structures	0.726	0.345	0.381	1
(10) Motility	Beta	0.589	0.008	0.572	0.604	1	Sessile	0.738	0.336	0.402	1
							Vagile	0.115	0.244	0	0.358
(11) Perturbations*	Beta	0.753276	0.0881642	0.533983	0.869112	1	Abiotic other	0.0323684	0.123782	1.48e-14	0.155657
							Biotic other	0.0211755	0.114256	1.14e-19	0.0911721
							Disease	0.0450829	0.14649	7.36e-19	0.361516
							Turbidity and sedimentation	0.032568	0.129407	2.77e-20	0.222291
							Mucillage	0.0298334	0.134514	9.64e-20	0.205447
							Pollution	0.0255128	0.119749	2.25e-18	0.100277
							Predator outbreak	0.023568	0.119737	3.33e-18	0.0933557
							Storm	0.0451282	0.132816	2.68e-13	0.226616
							Temperature anomaly	0.0665863	0.139077	1.35e-08	0.307493
