# Supplementary material for: Vulnerability of benthic trait diversity across the Mediterranean Sea following mass mortality events
Source: Nat Commun. 2025 Feb 12;16:1571. doi: 10.1038/s41467-025-55949-0 (PMC11821827; doi:10.1038/s41467-025-55949-0)
Supplement: Supplementary file 5 — Supplementary Data 2 [file 41467_2025_55949_MOESM5_ESM.xlsx]

## Sheet: Sup. Data 2
Species	Taxonomy	Feeding	Longevity	Coloniality	Morphology	Storage	Energy	Size	Growth	Calcification	Motility	Dataset
Acanthella acuta	Porifera	Active filter feeders by pumping	5 - 10 years	Colonial/Modular/Gregarious	Massive hemispheric	No	Heterotroph	Small (2-5 cm)	Slow (1 cm/yr)	Without calcareous structure	Sessile	Teixido_2024
Acetabularia acetabulum	Chlorophyta	Autotroph	< 1 - 1 year	Solitary	Filamentous	No	Photosynthetic autotroph	Small (2-5 cm)	Moderate (> 1-5 cm/yr)	With calcareous structures	Sessile	Teixido_2024
Acinetospora crinita	Ochrophyta	Autotroph	< 1 - 1 year	Solitary	Filamentous	No	Photosynthetic autotroph	Large (20-50 cm)	Very high (> 10 cm/yr)	Without calcareous structure	Sessile	Golo_2024
Acinetospora sp.	Ochrophyta	Autotroph	< 1 - 1 year	Colonial/Modular/Gregarious	Filamentous	No	Photosynthetic autotroph	Large (20-50 cm)	Very high (> 10 cm/yr)	Without calcareous structure	Sessile	Galobart_2023
Acrodiscus vidovichii	Rhodophyta	Autotroph	2 - 5 years	Solitary	Coarse branched	No	Photosynthetic autotroph	Small (2-5 cm)	Moderate (> 1-5 cm/yr)	Without calcareous structure	Sessile	Golo_2024
Acrosorium ciliolatum	Rhodophyta	Autotroph	< 1 - 1 year	Solitary	Foliose-erect	No	Photosynthetic autotroph	Very small (< 2 cm)	Moderate (> 1-5 cm/yr)	Without calcareous structure	Sessile	Galobart_2023
Acrosorium venulosum	Rhodophyta	Autotroph	< 1 - 1 year	Solitary	Foliose-erect	No	Photosynthetic autotroph	Very small (< 2 cm)	Moderate (> 1-5 cm/yr)	Without calcareous structure	Sessile	Teixido_2024
Acrosymphyton purpuriferum	Rhodophyta	Autotroph	< 1 - 1 year	Solitary	Coarse branched	No	Photosynthetic autotroph	Medium (5-20 cm)	High (5-10 cm/yr)	Without calcareous structure	Sessile	Teixido_2024
Acrothamnion preissii	Rhodophyta	Autotroph	< 1 - 1 year	Solitary	Filamentous	No	Photosynthetic autotroph	Small (2-5 cm)	High (5-10 cm/yr)	Without calcareous structure	Sessile	Teixido_2024
Adeonella calveti	Bryozoa	Active filter feeders with cilia	5 - 10 years	Colonial/Modular/Gregarious	Tree-like	No	Heterotroph	Small (2-5 cm)	Moderate (> 1-5 cm/yr)	With calcareous structures	Sessile	Current_Study
Agelas oroides	Porifera	Active filter feeders by pumping	10 - 20 years	Colonial/Modular/Gregarious	Massive erect	No	Photo-heterotroph	Large (20-50 cm)	Slow (1 cm/yr)	Without calcareous structure	Sessile	Current_Study
Aglaophenia sp.	Cnidaria	Passive filter feeders	< 1 - 1 year	Colonial/Modular/Gregarious	Articulated	No	Heterotroph	Small (2-5 cm)	Moderate (> 1-5 cm/yr)	Without calcareous structure	Sessile	Golo_2024
Alsidium corallinum	Rhodophyta	Autotroph	< 1 - 1 year	Solitary	Coarse branched	No	Photosynthetic autotroph	Small (2-5 cm)	Moderate (> 1-5 cm/yr)	Without calcareous structure	Sessile	Golo_2024
Amathia verticillata	Bryozoa	Active filter feeders with cilia	< 1 - 1 year	Colonial/Modular/Gregarious	Filamentous	No	Heterotroph	Large (20-50 cm)	Very high (> 10 cm/yr)	Without calcareous structure	Sessile	Current_Study
Amphiroa cryptarthrodia	Rhodophyta	Autotroph	< 1 - 1 year	Solitary	Articulated	No	Photosynthetic autotroph	Small (2-5 cm)	Moderate (> 1-5 cm/yr)	With calcareous structures	Sessile	Teixido_2024
Amphiroa rigida	Rhodophyta	Autotroph	< 1 - 1 year	Solitary	Articulated	No	Photosynthetic autotroph	Small (2-5 cm)	Moderate (> 1-5 cm/yr)	With calcareous structures	Sessile	Teixido_2024
Anadyomene stellata	Chlorophyta	Autotroph	< 1 - 1 year	Solitary	Foliose-erect	No	Photosynthetic autotroph	Small (2-5 cm)	Moderate (> 1-5 cm/yr)	Without calcareous structure	Sessile	Teixido_2024
Anotrichium barbatum	Rhodophyta	Autotroph	< 1 - 1 year	Solitary	Filamentous	No	Photosynthetic autotroph	Very small (< 2 cm)	Extreme slow (< 1 cm/yr)	Without calcareous structure	Sessile	Galobart_2023
Antithamnion cruciatum	Rhodophyta	Autotroph	< 1 - 1 year	Solitary	Filamentous	No	Photosynthetic autotroph	Very small (< 2 cm)	Slow (1 cm/yr)	Without calcareous structure	Sessile	Golo_2024
Antithamnion sp.	Rhodophyta	Autotroph	< 1 - 1 year	Solitary	Filamentous	No	Photosynthetic autotroph	Very small (< 2 cm)	Slow (1 cm/yr)	Without calcareous structure	Sessile	Galobart_2023
Aplidium conicum	Chordata	Active filter feeders by pumping	2 - 5 years	Colonial/Modular/Gregarious	Massive encrusting	No	Heterotroph	Medium (5-20 cm)	Moderate (> 1-5 cm/yr)	Without calcareous structure	Sessile	Gomez_Gras_2021
Aplidium fuscum	Chordata	Active filter feeders by pumping	2 - 5 years	Colonial/Modular/Gregarious	Encrusting, encrusting leaf-like	No	Heterotroph	Small (2-5 cm)	Moderate (> 1-5 cm/yr)	Without calcareous structure	Sessile	Gomez_Gras_2021
Aplysilla sulfurea	Porifera	Active filter feeders by pumping	5 - 10 years	Colonial/Modular/Gregarious	Massive hemispheric	No	Heterotroph	Small (2-5 cm)	Moderate (> 1-5 cm/yr)	Without calcareous structure	Sessile	Teixido_2024
Aplysina cavernicola	Porifera	Active filter feeders by pumping	10 - 20 years	Colonial/Modular/Gregarious	Massive hemispheric	No	Heterotroph	Medium (5-20 cm)	Moderate (> 1-5 cm/yr)	Without calcareous structure	Sessile	Teixido_2024
Apoglossum ruscifolium	Rhodophyta	Autotroph	< 1 - 1 year	Solitary	Foliose-erect	No	Photosynthetic autotroph	Very small (< 2 cm)	Slow (1 cm/yr)	Without calcareous structure	Sessile	Golo_2024
Arbacia lixula	Echinodermata	Herbivores / Grazers	10 - 20 years	Solitary	Massive hemispheric	No	Heterotroph	Small (2-5 cm)	Slow (1 cm/yr)	With calcareous structures	Vagile	Current_Study
Arca noae	Mollusca	Active filter feeders by pumping	10 - 20 years	Solitary	Massive encrusting	No	Heterotroph	Small (2-5 cm)	Slow (1 cm/yr)	With calcareous structures	Sessile	Current_Study
Arca spp.	Mollusca	Active filter feeders by pumping	10 - 20 years	Solitary	Massive encrusting	No	Heterotroph	Small (2-5 cm)	Slow (1 cm/yr)	With calcareous structures	Sessile	Current_Study
Asparagopsis sp. Falkenbergia stadio	Rhodophyta	Autotroph	< 1 - 1 year	Solitary	Filamentous	No	Photosynthetic autotroph	Very small (< 2 cm)	Slow (1 cm/yr)	Without calcareous structure	Sessile	Golo_2024
Astroides calycularis	Cnidaria	Passive filter feeders	≥ 20 years	Colonial/Modular/Gregarious	Massive hemispheric	No	Heterotroph	Medium (5-20 cm)	Moderate (> 1-5 cm/yr)	With calcareous structures	Sessile	Current_Study
Axinella damicornis	Porifera	Active filter feeders by pumping	5 - 10 years	Colonial/Modular/Gregarious	Massive hemispheric	No	Heterotroph	Medium (5-20 cm)	Moderate (> 1-5 cm/yr)	Without calcareous structure	Sessile	Teixido_2024
Axinella polypoides	Porifera	Active filter feeders by pumping	10 - 20 years	Colonial/Modular/Gregarious	Tree-like	No	Heterotroph	Large (20-50 cm)	Moderate (> 1-5 cm/yr)	Without calcareous structure	Sessile	Gomez_Gras_2021
Balanophyllia europaea	Cnidaria	Passive filter feeders	10 - 20 years	Solitary	Cup-like	No	Photo-heterotroph	Small (2-5 cm)	Slow (1 cm/yr)	With calcareous structures	Sessile	Current_Study
Balanophyllia sp.	Cnidaria	Passive filter feeders	10 - 20 years	Colonial/Modular/Gregarious	Cup-like	No	Photo-heterotroph	Small (2-5 cm)	Slow (1 cm/yr)	With calcareous structures	Sessile	Golo_2024
Balanus sp.	Arthropoda	Active filter feeders with cilia	2 - 5 years	Solitary	Massive hemispheric	No	Heterotroph	Very small (< 2 cm)	Moderate (> 1-5 cm/yr)	With calcareous structures	Sessile	Teixido_2024
Batophora occidentalis var. largoensis	Chlorophyta	Autotroph	< 1 - 1 year	Colonial/Modular/Gregarious	Coarse branched	No	Photosynthetic autotroph	Small (2-5 cm)	Moderate (> 1-5 cm/yr)	Without calcareous structure	Sessile	Galobart_2023
Beania magellanica	Bryozoa	Active filter feeders with cilia	< 1 - 1 year	Colonial/Modular/Gregarious	Foliose-erect	No	Heterotroph	Small (2-5 cm)	Moderate (> 1-5 cm/yr)	Without calcareous structure	Sessile	Teixido_2024
Beania sp.	Bryozoa	Active filter feeders with cilia	< 1 - 1 year	Colonial/Modular/Gregarious	Coarse branched	No	Heterotroph	Small (2-5 cm)	Moderate (> 1-5 cm/yr)	Without calcareous structure	Sessile	Golo_2024
Bonellia viridis	Annelida	Detritivores	5 - 10 years	Solitary	Filamentous	No	Heterotroph	Medium (5-20 cm)	Moderate (> 1-5 cm/yr)	Without calcareous structure	Sessile	Teixido_2024
Botryocladia botryoides	Rhodophyta	Autotroph	< 1 - 1 year	Solitary	Coarse branched	No	Photosynthetic autotroph	Small (2-5 cm)	Moderate (> 1-5 cm/yr)	Without calcareous structure	Sessile	Teixido_2024
Botryocladia sp.	Rhodophyta	Autotroph	< 1 - 1 year	Solitary	Coarse branched	No	Photosynthetic autotroph	Very small (< 2 cm)	Moderate (> 1-5 cm/yr)	Without calcareous structure	Sessile	Golo_2024
Brachidontes pharaonis	Mollusca	Active filter feeders by pumping	2 - 5 years	Solitary	Massive encrusting	No	Heterotroph	Small (2-5 cm)	Slow (1 cm/yr)	With calcareous structures	Sessile	Current_Study
Bryopsis duplex	Chlorophyta	Autotroph	< 1 - 1 year	Solitary	Filamentous	No	Photosynthetic autotroph	Small (2-5 cm)	Moderate (> 1-5 cm/yr)	Without calcareous structure	Sessile	Teixido_2024
Bryopsis sp.	Chlorophyta	Autotroph	< 1 - 1 year	Colonial/Modular/Gregarious	Filamentous	No	Photosynthetic autotroph	Small (2-5 cm)	Moderate (> 1-5 cm/yr)	Without calcareous structure	Sessile	Galobart_2023
Bugulina calathus	Bryozoa	Active filter feeders with cilia	< 1 - 1 year	Colonial/Modular/Gregarious	Articulated	No	Heterotroph	Small (2-5 cm)	Moderate (> 1-5 cm/yr)	With calcareous structures	Sessile	Teixido_2024
Bugulina flabellata	Bryozoa	Active filter feeders with cilia	< 1 - 1 year	Colonial/Modular/Gregarious	Articulated	No	Heterotroph	Small (2-5 cm)	Moderate (> 1-5 cm/yr)	With calcareous structures	Sessile	Teixido_2024
Caberea boryi	Bryozoa	Active filter feeders with cilia	< 1 - 1 year	Colonial/Modular/Gregarious	Articulated	No	Heterotroph	Very small (< 2 cm)	Slow (1 cm/yr)	With calcareous structures	Sessile	Teixido_2024
Cacospongia mollior	Porifera	Active filter feeders by pumping	10 - 20 years	Colonial/Modular/Gregarious	Massive hemispheric	No	Heterotroph	Medium (5-20 cm)	Slow (1 cm/yr)	Without calcareous structure	Sessile	Current_Study
Cacospongia spp.	Porifera	Active filter feeders by pumping	10 - 20 years	Colonial/Modular/Gregarious	Massive hemispheric	No	Heterotroph	Medium (5-20 cm)	Slow (1 cm/yr)	Without calcareous structure	Sessile	Current_Study
Calcinus tubularis	Arthropoda	Carnivores	2 - 5 years	Solitary	Articulated	No	Heterotroph	Very small (< 2 cm)	Moderate (> 1-5 cm/yr)	With calcareous structures	Vagile	Teixido_2024
Calliactis parasitica	Cnidaria	Carnivores	2 - 5 years	Solitary	Massive erect	No	Heterotroph	Medium (5-20 cm)	Moderate (> 1-5 cm/yr)	Without calcareous structure	Sessile	Current_Study
Calpensia nobilis	Bryozoa	Active filter feeders with cilia	2 - 5 years	Colonial/Modular/Gregarious	Encrusting, encrusting leaf-like	No	Heterotroph	Very small (< 2 cm)	Moderate (> 1-5 cm/yr)	With calcareous structures	Sessile	Current_Study
Calyx nicaeensis	Porifera	Active filter feeders by pumping	≥ 20 years	Colonial/Modular/Gregarious	Massive erect	No	Heterotroph	Large (20-50 cm)	Slow (1 cm/yr)	Without calcareous structure	Sessile	Current_Study
Caryophyllia inornata	Cnidaria	Passive filter feeders	10 - 20 years	Solitary	Cup-like	No	Heterotroph	Small (2-5 cm)	Slow (1 cm/yr)	With calcareous structures	Sessile	Teixido_2024
Caryophyllia smithii	Cnidaria	Passive filter feeders	10 - 20 years	Solitary	Cup-like	No	Heterotroph	Small (2-5 cm)	Slow (1 cm/yr)	With calcareous structures	Sessile	Teixido_2024
Caulerpa cylindracea	Chlorophyta	Autotroph	5 - 10 years	Colonial/Modular/Gregarious	Stolonial	No	Photosynthetic autotroph	Medium (5-20 cm)	Very high (> 10 cm/yr)	Without calcareous structure	Sessile	Teixido_2024
Caulerpa prolifera	Chlorophyta	Autotroph	< 1 - 1 year	Solitary	Stolonial	No	Photosynthetic autotroph	Medium (5-20 cm)	Very high (> 10 cm/yr)	Without calcareous structure	Sessile	Golo_2024
Cellaria salicornioides	Bryozoa	Active filter feeders with cilia	< 1 - 1 year	Colonial/Modular/Gregarious	Articulated	No	Heterotroph	Small (2-5 cm)	Moderate (> 1-5 cm/yr)	With calcareous structures	Sessile	Teixido_2024
Celleporina caminata	Bryozoa	Active filter feeders with cilia	2 - 5 years	Colonial/Modular/Gregarious	Massive encrusting	No	Heterotroph	Very small (< 2 cm)	Moderate (> 1-5 cm/yr)	With calcareous structures	Sessile	Teixido_2024
Celleporina sp.	Bryozoa	Active filter feeders with cilia	< 1 - 1 year	Colonial/Modular/Gregarious	Massive encrusting	No	Heterotroph	Very small (< 2 cm)	Moderate (> 1-5 cm/yr)	With calcareous structures	Sessile	Teixido_2024
Centrostephanus longispinus	Echinodermata	Carnivores	10 - 20 years	Solitary	Massive hemispheric	No	Heterotroph	Small (2-5 cm)	Slow (1 cm/yr)	With calcareous structures	Vagile	Teixido_2024
Ceramiaceae	Rhodophyta	Autotroph	< 1 - 1 year	Solitary	Filamentous	No	Photosynthetic autotroph	Very small (< 2 cm)	Slow (1 cm/yr)	Without calcareous structure	Sessile	Golo_2024
Ceramium sp.	Rhodophyta	Autotroph	< 1 - 1 year	Solitary	Filamentous	No	Photosynthetic autotroph	Very small (< 2 cm)	Slow (1 cm/yr)	Without calcareous structure	Sessile	Golo_2024
Ceramium tenuicorne	Rhodophyta	Autotroph	< 1 - 1 year	Colonial/Modular/Gregarious	Filamentous	No	Photosynthetic autotroph	Very small (< 2 cm)	Slow (1 cm/yr)	Without calcareous structure	Sessile	Galobart_2023
Ceramium virgatum	Rhodophyta	Autotroph	< 1 - 1 year	Colonial/Modular/Gregarious	Filamentous	No	Photosynthetic autotroph	Medium (5-20 cm)	Moderate (> 1-5 cm/yr)	Without calcareous structure	Sessile	Galobart_2023
Cerianthus membranaceus	Cnidaria	Passive filter feeders	5 - 10 years	Solitary	Massive erect	No	Heterotroph	Large (20-50 cm)	Moderate (> 1-5 cm/yr)	Without calcareous structure	Sessile	Teixido_2024
Chaetomorpha sp.	Chlorophyta	Autotroph	< 1 - 1 year	Solitary	Filamentous	No	Photosynthetic autotroph	Large (20-50 cm)	Very high (> 10 cm/yr)	Without calcareous structure	Sessile	Galobart_2023
Champia parvula	Rhodophyta	Autotroph	< 1 - 1 year	Solitary	Coarse branched	No	Photosynthetic autotroph	Small (2-5 cm)	Slow (1 cm/yr)	Without calcareous structure	Sessile	Teixido_2024
Chartella tenella	Bryozoa	Active filter feeders with cilia	10 - 20 years	Colonial/Modular/Gregarious	Tree-like	No	Heterotroph	Small (2-5 cm)	Moderate (> 1-5 cm/yr)	With calcareous structures	Sessile	Gomez_Gras_2021
Chondira dasyphylla	Rhodophyta	Autotroph	< 1 - 1 year	Solitary	Coarse branched	No	Photosynthetic autotroph	Very small (< 2 cm)	Moderate (> 1-5 cm/yr)	Without calcareous structure	Sessile	Golo_2024
Chondria capillaris	Rhodophyta	Autotroph	< 1 - 1 year	Solitary	Coarse branched	No	Photosynthetic autotroph	Small (2-5 cm)	Moderate (> 1-5 cm/yr)	Without calcareous structure	Sessile	Golo_2024
Chondria mairei	Rhodophyta	Autotroph	< 1 - 1 year	Solitary	Coarse branched	No	Photosynthetic autotroph	Very small (< 2 cm)	Moderate (> 1-5 cm/yr)	Without calcareous structure	Sessile	Galobart_2023
Chondria mediterranea	Rhodophyta	Autotroph	< 1 - 1 year	Solitary	Coarse branched	No	Photosynthetic autotroph	Small (2-5 cm)	Very high (> 10 cm/yr)	Without calcareous structure	Sessile	Gomez_Gras_2021
Chondria sp.	Rhodophyta	Autotroph	< 1 - 1 year	Solitary	Coarse branched	No	Photosynthetic autotroph	Very small (< 2 cm)	Moderate (> 1-5 cm/yr)	Without calcareous structure	Sessile	Golo_2024
Chondrilla nucula	Porifera	Active filter feeders by pumping	2 - 5 years	Colonial/Modular/Gregarious	Massive hemispheric	No	Photo-heterotroph	Small (2-5 cm)	Moderate (> 1-5 cm/yr)	Without calcareous structure	Sessile	Teixido_2024
Chondrosia reniformis	Porifera	Active filter feeders by pumping	10 - 20 years	Colonial/Modular/Gregarious	Massive encrusting	No	Photo-heterotroph	Medium (5-20 cm)	Moderate (> 1-5 cm/yr)	Without calcareous structure	Sessile	Current_Study
Choreonema thuretii	Rhodophyta	Autotroph	< 1 - 1 year	Solitary	Filamentous	No	Photosynthetic autotroph	Very small (< 2 cm)	Extreme slow (< 1 cm/yr)	With calcareous structures	Sessile	Golo_2024
Chylocladia verticillata	Rhodophyta	Autotroph	< 1 - 1 year	Solitary	Coarse branched	No	Photosynthetic autotroph	Medium (5-20 cm)	Very high (> 10 cm/yr)	Without calcareous structure	Sessile	Golo_2024
Cladocora caespitosa	Cnidaria	Passive filter feeders	≥ 20 years	Colonial/Modular/Gregarious	Massive hemispheric	No	Photo-heterotroph	Large (20-50 cm)	Slow (1 cm/yr)	With calcareous structures	Sessile	Current_Study
Cladophora aff coelothrix	Chlorophyta	Autotroph	< 1 - 1 year	Solitary	Filamentous	No	Photosynthetic autotroph	Small (2-5 cm)	Very high (> 10 cm/yr)	Without calcareous structure	Sessile	Teixido_2024
Cladophora coelothrix	Chlorophyta	Autotroph	< 1 - 1 year	Solitary	Filamentous	No	Photosynthetic autotroph	Small (2-5 cm)	High (5-10 cm/yr)	Without calcareous structure	Sessile	Teixido_2024
Cladophora prolifera	Chlorophyta	Autotroph	2 - 5 years	Solitary	Filamentous	No	Photosynthetic autotroph	Small (2-5 cm)	High (5-10 cm/yr)	Without calcareous structure	Sessile	Teixido_2024
Cladophora sp.	Chlorophyta	Autotroph	< 1 - 1 year	Solitary	Filamentous	No	Photosynthetic autotroph	Small (2-5 cm)	High (5-10 cm/yr)	Without calcareous structure	Sessile	Teixido_2024
Cladophora vagabunda	Chlorophyta	Autotroph	< 1 - 1 year	Solitary	Filamentous	No	Photosynthetic autotroph	Medium (5-20 cm)	Very high (> 10 cm/yr)	Without calcareous structure	Sessile	Galobart_2023
Cladophoropsis membranacea	Chlorophyta	Autotroph	< 1 - 1 year	Solitary	Filamentous	No	Photosynthetic autotroph	Small (2-5 cm)	Moderate (> 1-5 cm/yr)	Without calcareous structure	Sessile	Galobart_2023
Cladosiphon sp.	Chlorophyta	Autotroph	< 1 - 1 year	Solitary	Coarse branched	No	Photosynthetic autotroph	Medium (5-20 cm)	High (5-10 cm/yr)	Without calcareous structure	Sessile	Galobart_2023
Cladostephus hirsutus	Ochrophyta	Autotroph	< 1 - 1 year	Solitary	Coarse branched	No	Photosynthetic autotroph	Medium (5-20 cm)	High (5-10 cm/yr)	Without calcareous structure	Sessile	Golo_2024
Cladostephus spongiosus	Ochrophyta	Autotroph	< 1 - 1 year	Solitary	Coarse branched	No	Photosynthetic autotroph	Medium (5-20 cm)	High (5-10 cm/yr)	Without calcareous structure	Sessile	Teixido_2024
Clathrina clathrus	Porifera	Active filter feeders by pumping	2 - 5 years	Colonial/Modular/Gregarious	Massive hemispheric	No	Heterotroph	Small (2-5 cm)	Moderate (> 1-5 cm/yr)	With calcareous structures	Sessile	Teixido_2024
Clathrina contorta	Porifera	Active filter feeders by pumping	2 - 5 years	Colonial/Modular/Gregarious	Massive hemispheric	No	Heterotroph	Small (2-5 cm)	Moderate (> 1-5 cm/yr)	With calcareous structures	Sessile	Teixido_2024
Clathrina coriacea	Porifera	Active filter feeders by pumping	2 - 5 years	Colonial/Modular/Gregarious	Massive hemispheric	No	Heterotroph	Small (2-5 cm)	Moderate (> 1-5 cm/yr)	With calcareous structures	Sessile	Gomez_Gras_2021
Clathrina sp.	Porifera	Active filter feeders by pumping	2 - 5 years	Colonial/Modular/Gregarious	Massive hemispheric	No	Heterotroph	Small (2-5 cm)	Moderate (> 1-5 cm/yr)	With calcareous structures	Sessile	Teixido_2024
Clavelina lepadiformis	Chordata	Active filter feeders by pumping	< 1 - 1 year	Colonial/Modular/Gregarious	Cup-like	No	Heterotroph	Small (2-5 cm)	Moderate (> 1-5 cm/yr)	Without calcareous structure	Sessile	Gomez_Gras_2021
Clavellina dellavallei	Chordata	Active filter feeders by pumping	< 1 - 1 year	Colonial/Modular/Gregarious	Cup-like	No	Heterotroph	Small (2-5 cm)	Moderate (> 1-5 cm/yr)	Without calcareous structure	Sessile	Teixido_2024
Clibanarius erythropus	Arthropoda	Carnivores	2 - 5 years	Solitary	Articulated	No	Heterotroph	Very small (< 2 cm)	Moderate (> 1-5 cm/yr)	With calcareous structures	Vagile	Teixido_2024
Cliona celata	Porifera	Active filter feeders by pumping	10 - 20 years	Colonial/Modular/Gregarious	Boring	No	Heterotroph	Very small (< 2 cm)	Slow (1 cm/yr)	Without calcareous structure	Sessile	Teixido_2024
Cliona viridis	Porifera	Active filter feeders by pumping	10 - 20 years	Colonial/Modular/Gregarious	Boring	No	Photo-heterotroph	Very small (< 2 cm)	Slow (1 cm/yr)	Without calcareous structure	Sessile	Teixido_2024
Codium bursa	Chlorophyta	Autotroph	5 - 10 years	Solitary	Massive hemispheric	No	Photosynthetic autotroph	Medium (5-20 cm)	Moderate (> 1-5 cm/yr)	Without calcareous structure	Sessile	Teixido_2024
Codium sp.	Chlorophyta	Autotroph	5 - 10 years	Solitary	Massive hemispheric	No	Photosynthetic autotroph	Medium (5-20 cm)	Moderate (> 1-5 cm/yr)	Without calcareous structure	Sessile	Golo_2024
Colpomenia sinuosa	Ochrophyta	Autotroph	< 1 - 1 year	Solitary	Massive hemispheric	No	Photosynthetic autotroph	Small (2-5 cm)	High (5-10 cm/yr)	Without calcareous structure	Sessile	Teixido_2024
Contarinia peyssonneliiformis	Rhodophyta	Autotroph	2 - 5 years	Solitary	Encrusting, encrusting leaf-like	No	Photosynthetic autotroph	Very small (< 2 cm)	Moderate (> 1-5 cm/yr)	Without calcareous structure	Sessile	Golo_2024
Corallium rubrum	Cnidaria	Passive filter feeders	≥ 20 years	Colonial/Modular/Gregarious	Tree-like	No	Heterotroph	Medium (5-20 cm)	Extreme slow (< 1 cm/yr)	With calcareous structures	Sessile	Current_Study
Cornularia cornucopiae	Cnidaria	Passive filter feeders	< 1 - 1 year	Colonial/Modular/Gregarious	Cup-like	No	Heterotroph	Very small (< 2 cm)	Moderate (> 1-5 cm/yr)	Without calcareous structure	Sessile	Teixido_2024
Corticium candelabrum	Porifera	Active filter feeders by pumping	5 - 10 years	Colonial/Modular/Gregarious	Massive hemispheric	No	Heterotroph	Small (2-5 cm)	Slow (1 cm/yr)	Without calcareous structure	Sessile	Teixido_2024
Corynactis viridis	Cnidaria	Passive filter feeders	10 - 20 years	Solitary	Cup-like	No	Heterotroph	Small (2-5 cm)	High (5-10 cm/yr)	Without calcareous structure	Sessile	Gomez_Gras_2021
Cottoniella filamentosa	Rhodophyta	Autotroph	10 - 20 years	Solitary	Encrusting, encrusting leaf-like	No	Photosynthetic autotroph	Very small (< 2 cm)	Slow (1 cm/yr)	Without calcareous structure	Sessile	Golo_2024
Crambe crambe	Porifera	Active filter feeders by pumping	≥ 20 years	Colonial/Modular/Gregarious	Encrusting, encrusting leaf-like	No	Photo-heterotroph	Very small (< 2 cm)	Slow (1 cm/yr)	Without calcareous structure	Sessile	Current_Study
Crambe sp.	Porifera	Active filter feeders by pumping	< 1 - 1 year	Colonial/Modular/Gregarious	Encrusting, encrusting leaf-like	No	Heterotroph	Medium (5-20 cm)	High (5-10 cm/yr)	Without calcareous structure	Sessile	Golo_2024
Crella cf. incrustans	Porifera	Active filter feeders by pumping	5 - 10 years	Colonial/Modular/Gregarious	Encrusting, encrusting leaf-like	No	Heterotroph	Very small (< 2 cm)	Slow (1 cm/yr)	Without calcareous structure	Sessile	Teixido_2024
Crella elegans	Porifera	Active filter feeders by pumping	5 - 10 years	Colonial/Modular/Gregarious	Encrusting, encrusting leaf-like	No	Heterotroph	Very small (< 2 cm)	Slow (1 cm/yr)	Without calcareous structure	Sessile	Teixido_2024
Crella mollior	Porifera	Active filter feeders by pumping	5 - 10 years	Colonial/Modular/Gregarious	Encrusting, encrusting leaf-like	No	Heterotroph	Very small (< 2 cm)	Slow (1 cm/yr)	Without calcareous structure	Sessile	Teixido_2024
Crella pulvinar	Porifera	Active filter feeders by pumping	5 - 10 years	Colonial/Modular/Gregarious	Encrusting, encrusting leaf-like	No	Heterotroph	Very small (< 2 cm)	Slow (1 cm/yr)	Without calcareous structure	Sessile	Teixido_2024
Crisia sigmoidea	Bryozoa	Active filter feeders with cilia	< 1 - 1 year	Colonial/Modular/Gregarious	Articulated	No	Heterotroph	Small (2-5 cm)	Slow (1 cm/yr)	With calcareous structures	Sessile	Teixido_2024
Crisia sp.	Bryozoa	Active filter feeders with cilia	< 1 - 1 year	Colonial/Modular/Gregarious	Articulated	No	Heterotroph	Small (2-5 cm)	Slow (1 cm/yr)	With calcareous structures	Sessile	Teixido_2024
Crouania attenuata	Rhodophyta	Autotroph	< 1 - 1 year	Solitary	Encrusting, encrusting leaf-like	No	Photosynthetic autotroph	Very small (< 2 cm)	Moderate (> 1-5 cm/yr)	Without calcareous structure	Sessile	Golo_2024
Cryptonemia lomation	Rhodophyta	Autotroph	< 1 - 1 year	Solitary	Coarse branched	No	Photosynthetic autotroph	Small (2-5 cm)	Moderate (> 1-5 cm/yr)	Without calcareous structure	Sessile	Teixido_2024
Cryptonemia palmetta	Rhodophyta	Autotroph	< 1 - 1 year	Solitary	Coarse branched	No	Photosynthetic autotroph	Small (2-5 cm)	Moderate (> 1-5 cm/yr)	Without calcareous structure	Sessile	Golo_2024
Cryptonemia tuniformis	Rhodophyta	Autotroph	2 - 5 years	Solitary	Coarse branched	No	Photosynthetic autotroph	Small (2-5 cm)	Moderate (> 1-5 cm/yr)	Without calcareous structure	Sessile	Golo_2024
Cutleria adspersa Aglaozonia stadio	Ochrophyta	Autotroph	5 - 10 years	Solitary	Encrusting, encrusting leaf-like	No	Photosynthetic autotroph	Very small (< 2 cm)	Slow (1 cm/yr)	Without calcareous structure	Sessile	Teixido_2024
Cutleria chilosa Aglaozonia stadio	Ochrophyta	Autotroph	< 1 - 1 year	Solitary	Encrusting, encrusting leaf-like	No	Photosynthetic autotroph	Very small (< 2 cm)	High (5-10 cm/yr)	Without calcareous structure	Sessile	Golo_2024
Cutleria multifida Aglaozonia stadio	Ochrophyta	Autotroph	< 1 - 1 year	Solitary	Encrusting, encrusting leaf-like	No	Photosynthetic autotroph	Very small (< 2 cm)	Slow (1 cm/yr)	Without calcareous structure	Sessile	Teixido_2024
Cymodocea nodosa	Tracheophyta	Autotroph	≥ 20 years	Colonial/Modular/Gregarious	Tree-like	Potentially / Under discussion	Photosynthetic autotroph	Very large (> 50 cm)	Very high (> 10 cm/yr)	Without calcareous structure	Sessile	Galobart_2023
Cystodites dellechiajei	Chordata	Active filter feeders by pumping	5 - 10 years	Colonial/Modular/Gregarious	Massive hemispheric	No	Heterotroph	Small (2-5 cm)	Moderate (> 1-5 cm/yr)	With calcareous structures	Sessile	Teixido_2024
Cystoseira compressa	Ochrophyta	Autotroph	5 - 10 years	Solitary	Tree-like	Potentially / Under discussion	Photosynthetic autotroph	Large (20-50 cm)	High (5-10 cm/yr)	Without calcareous structure	Sessile	Golo_2024
Cystoseira foeniculacea	Ochrophyta	Autotroph	2 - 5 years	Solitary	Tree-like	Potentially / Under discussion	Photosynthetic autotroph	Very large (> 50 cm)	Very high (> 10 cm/yr)	Without calcareous structure	Sessile	Golo_2024
Cystoseira foeniculacea f. tenuiramosa	Ochrophyta	Autotroph	5 - 10 years	Solitary	Tree-like	Potentially / Under discussion	Photosynthetic autotroph	Medium (5-20 cm)	Very high (> 10 cm/yr)	Without calcareous structure	Sessile	Galobart_2023
Cystoseira humilis	Ochrophyta	Autotroph	10 - 20 years	Solitary	Tree-like	Potentially / Under discussion	Photosynthetic autotroph	Medium (5-20 cm)	High (5-10 cm/yr)	Without calcareous structure	Sessile	Current_Study
Cystoseira pustulata	Ochrophyta	Autotroph	2 - 5 years	Solitary	Tree-like	Potentially / Under discussion	Photosynthetic autotroph	Large (20-50 cm)	Very high (> 10 cm/yr)	Without calcareous structure	Sessile	Galobart_2023
Cystoseira sp.	Ochrophyta	Autotroph	10 - 20 years	Solitary	Tree-like	Potentially / Under discussion	Photosynthetic autotroph	Large (20-50 cm)	High (5-10 cm/yr)	Without calcareous structure	Sessile	Golo_2024
Darwinella sp.	Porifera	Active filter feeders by pumping	5 - 10 years	Colonial/Modular/Gregarious	Encrusting, encrusting leaf-like	No	Heterotroph	Very small (< 2 cm)	Slow (1 cm/yr)	Without calcareous structure	Sessile	Teixido_2024
Dasya rigidula	Rhodophyta	Autotroph	< 1 - 1 year	Colonial/Modular/Gregarious	Filamentous	No	Photosynthetic autotroph	Very small (< 2 cm)	Slow (1 cm/yr)	Without calcareous structure	Sessile	Galobart_2023
Dasya sp.	Rhodophyta	Autotroph	< 1 - 1 year	Solitary	Coarse branched	No	Photosynthetic autotroph	Very small (< 2 cm)	Moderate (> 1-5 cm/yr)	Without calcareous structure	Sessile	Golo_2024
Dasycladus vermicularis	Chlorophyta	Autotroph	< 1 - 1 year	Solitary	Coarse branched	No	Photosynthetic autotroph	Small (2-5 cm)	Moderate (> 1-5 cm/yr)	Without calcareous structure	Sessile	Teixido_2024
Dendropoma cristatum	Mollusca	Active filter feeders with cilia	≥ 20 years	Solitary	Massive encrusting	No	Heterotroph	Very small (< 2 cm)	Extreme slow (< 1 cm/yr)	With calcareous structures	Sessile	Current_Study
Dendroxea lenis	Porifera	Active filter feeders by pumping	10 - 20 years	Colonial/Modular/Gregarious	Encrusting, encrusting leaf-like	No	Heterotroph	Very small (< 2 cm)	Slow (1 cm/yr)	Without calcareous structure	Sessile	Teixido_2024
Dentiporella sardonica	Bryozoa	Active filter feeders with cilia	5 - 10 years	Colonial/Modular/Gregarious	Tree-like	No	Heterotroph	Small (2-5 cm)	Moderate (> 1-5 cm/yr)	With calcareous structures	Sessile	Gomez_Gras_2021
Derbesia tenuissima	Chlorophyta	Autotroph	< 1 - 1 year	Solitary	Filamentous	No	Photosynthetic autotroph	Very small (< 2 cm)	High (5-10 cm/yr)	Without calcareous structure	Sessile	Galobart_2023
Derbesia tenuissima Halicystis parvula stadio	Chlorophyta	Autotroph	< 1 - 1 year	Solitary	Massive hemispheric	No	Photosynthetic autotroph	Very small (< 2 cm)	High (5-10 cm/yr)	Without calcareous structure	Sessile	Teixido_2024
Desmanthus incrustans	Porifera	Active filter feeders by pumping	2 - 5 years	Colonial/Modular/Gregarious	Encrusting, encrusting leaf-like	No	Heterotroph	Very small (< 2 cm)	Moderate (> 1-5 cm/yr)	Without calcareous structure	Sessile	Teixido_2024
Dictyonella sp.	Porifera	Active filter feeders by pumping	5 - 10 years	Colonial/Modular/Gregarious	Encrusting, encrusting leaf-like	No	Heterotroph	Very small (< 2 cm)	Slow (1 cm/yr)	Without calcareous structure	Sessile	Teixido_2024
Dictyopteris lucida	Ochrophyta	Autotroph	< 1 - 1 year	Solitary	Foliose-erect	No	Photosynthetic autotroph	Large (20-50 cm)	Very high (> 10 cm/yr)	Without calcareous structure	Sessile	Teixido_2024
Dictyopteris polypodioides	Ochrophyta	Autotroph	< 1 - 1 year	Solitary	Foliose-erect	No	Photosynthetic autotroph	Large (20-50 cm)	Very high (> 10 cm/yr)	Without calcareous structure	Sessile	Golo_2024
Dictyopteris sp.	Ochrophyta	Autotroph	< 1 - 1 year	Solitary	Foliose-erect	No	Photosynthetic autotroph	Large (20-50 cm)	Very high (> 10 cm/yr)	Without calcareous structure	Sessile	Golo_2024
Dictyota dichotoma	Ochrophyta	Autotroph	< 1 - 1 year	Solitary	Foliose-erect	No	Photosynthetic autotroph	Medium (5-20 cm)	High (5-10 cm/yr)	Without calcareous structure	Sessile	Teixido_2024
Dictyota dichotoma var. intricata	Ochrophyta	Autotroph	< 1 - 1 year	Solitary	Foliose-erect	No	Photosynthetic autotroph	Medium (5-20 cm)	High (5-10 cm/yr)	Without calcareous structure	Sessile	Teixido_2024
Dictyota fasciola	Ochrophyta	Autotroph	< 1 - 1 year	Solitary	Foliose-erect	No	Photosynthetic autotroph	Medium (5-20 cm)	High (5-10 cm/yr)	Without calcareous structure	Sessile	Teixido_2024
Dictyota implexa	Ochrophyta	Autotroph	< 1 - 1 year	Solitary	Foliose-erect	No	Photosynthetic autotroph	Medium (5-20 cm)	High (5-10 cm/yr)	Without calcareous structure	Sessile	Teixido_2024
Dictyota mediterranea	Ochrophyta	Autotroph	< 1 - 1 year	Colonial/Modular/Gregarious	Foliose-erect	No	Photosynthetic autotroph	Medium (5-20 cm)	High (5-10 cm/yr)	Without calcareous structure	Sessile	Galobart_2023
Dictyota spiralis	Ochrophyta	Autotroph	< 1 - 1 year	Solitary	Foliose-erect	No	Photosynthetic autotroph	Medium (5-20 cm)	High (5-10 cm/yr)	Without calcareous structure	Sessile	Teixido_2024
Didemnum cf. commune	Chordata	Active filter feeders by pumping	< 1 - 1 year	Colonial/Modular/Gregarious	Encrusting, encrusting leaf-like	No	Heterotroph	Very small (< 2 cm)	Moderate (> 1-5 cm/yr)	Without calcareous structure	Sessile	Teixido_2024
Didemnum sp.	Chordata	Active filter feeders by pumping	< 1 - 1 year	Colonial/Modular/Gregarious	Encrusting, encrusting leaf-like	No	Heterotroph	Very small (< 2 cm)	Moderate (> 1-5 cm/yr)	With calcareous structures	Sessile	Teixido_2024
Didemnum vexillum	Chordata	Active filter feeders by pumping	< 1 - 1 year	Colonial/Modular/Gregarious	Encrusting, encrusting leaf-like	No	Heterotroph	Very small (< 2 cm)	Moderate (> 1-5 cm/yr)	Without calcareous structure	Sessile	Gomez_Gras_2021
Diplastrella bistellata	Porifera	Active filter feeders by pumping	10 - 20 years	Colonial/Modular/Gregarious	Encrusting, encrusting leaf-like	No	Heterotroph	Very small (< 2 cm)	Slow (1 cm/yr)	Without calcareous structure	Sessile	Teixido_2024
Diplastrella cf. ornata	Porifera	Active filter feeders by pumping	10 - 20 years	Colonial/Modular/Gregarious	Encrusting, encrusting leaf-like	No	Heterotroph	Very small (< 2 cm)	Slow (1 cm/yr)	Without calcareous structure	Sessile	Teixido_2024
Diplosoma spongiforme	Chordata	Active filter feeders by pumping	2 - 5 years	Colonial/Modular/Gregarious	Encrusting, encrusting leaf-like	No	Heterotroph	Very small (< 2 cm)	Moderate (> 1-5 cm/yr)	Without calcareous structure	Sessile	Teixido_2024
Discosporangium mesarthrocarpum	Ochrophyta	Autotroph	< 1 - 1 year	Solitary	Filamentous	No	Photosynthetic autotroph	Small (2-5 cm)	Moderate (> 1-5 cm/yr)	Without calcareous structure	Sessile	Teixido_2024
Discosporangium sp.	Ochrophyta	Autotroph	< 1 - 1 year	Solitary	Encrusting, encrusting leaf-like	No	Photosynthetic autotroph	Small (2-5 cm)	Moderate (> 1-5 cm/yr)	Without calcareous structure	Sessile	Golo_2024
Disporella hispida	Bryozoa	Active filter feeders with cilia	10 - 20 years	Colonial/Modular/Gregarious	Encrusting, encrusting leaf-like	No	Heterotroph	Very small (< 2 cm)	Moderate (> 1-5 cm/yr)	With calcareous structures	Sessile	Gomez_Gras_2021
Dromia personata	Arthropoda	Carnivores	5 - 10 years	Solitary	Articulated	No	Heterotroph	Medium (5-20 cm)	Moderate (> 1-5 cm/yr)	With calcareous structures	Vagile	Teixido_2024
Dynamena sp.	Cnidaria	Active filter feeders with cilia	< 1 - 1 year	Colonial/Modular/Gregarious	Filamentous	No	Heterotroph	Very small (< 2 cm)	Very high (> 10 cm/yr)	Without calcareous structure	Sessile	Gomez_Gras_2021
Dysidea avara	Porifera	Active filter feeders by pumping	10 - 20 years	Colonial/Modular/Gregarious	Massive encrusting	No	Photo-heterotroph	Medium (5-20 cm)	Slow (1 cm/yr)	Without calcareous structure	Sessile	Current_Study
Echinaster sepositus	Echinodermata	Carnivores	10 - 20 years	Solitary	Massive hemispheric	No	Heterotroph	Small (2-5 cm)	Slow (1 cm/yr)	With calcareous structures	Vagile	Teixido_2024
Ellisolandia elongata	Rhodophyta	Autotroph	2 - 5 years	Solitary	Articulated	No	Photosynthetic autotroph	Small (2-5 cm)	Moderate (> 1-5 cm/yr)	With calcareous structures	Sessile	Teixido_2024
Encrusting coralline algae	Rhodophyta	Autotroph	10 - 20 years	Solitary	Encrusting, encrusting leaf-like	No	Photosynthetic autotroph	Very small (< 2 cm)	Slow (1 cm/yr)	With calcareous structures	Sessile	Current_Study
Ericaria balearica	Ochrophyta	Autotroph	5 - 10 years	Solitary	Tree-like	Potentially / Under discussion	Photosynthetic autotroph	Large (20-50 cm)	High (5-10 cm/yr)	Without calcareous structure	Sessile	Golo_2024
Ericaria crinita	Ochrophyta	Autotroph	5 - 10 years	Solitary	Tree-like	Potentially / Under discussion	Photosynthetic autotroph	Large (20-50 cm)	Very high (> 10 cm/yr)	Without calcareous structure	Sessile	Current_Study
Ericaria zosteroides	Ochrophyta	Autotroph	≥ 20 years	Solitary	Tree-like	Potentially / Under discussion	Photosynthetic autotroph	Large (20-50 cm)	Extreme slow (< 1 cm/yr)	Without calcareous structure	Sessile	Current_Study
Erylus euastrum	Porifera	Active filter feeders by pumping	10 - 20 years	Colonial/Modular/Gregarious	Massive hemispheric	No	Heterotroph	Small (2-5 cm)	Extreme slow (< 1 cm/yr)	Without calcareous structure	Sessile	Teixido_2024
Erythroglossum sandrianum	Rhodophyta	Autotroph	< 1 - 1 year	Solitary	Foliose-erect	No	Photosynthetic autotroph	Small (2-5 cm)	Very high (> 10 cm/yr)	Without calcareous structure	Sessile	Gomez_Gras_2021
Ethelia vanbosseae	Rhodophyta	Autotroph	5 - 10 years	Solitary	Encrusting, encrusting leaf-like	No	Photosynthetic autotroph	Very small (< 2 cm)	Slow (1 cm/yr)	Without calcareous structure	Sessile	Teixido_2024
Eudendrium sp.	Cnidaria	Passive filter feeders	< 1 - 1 year	Colonial/Modular/Gregarious	Filamentous	No	Heterotroph	Medium (5-20 cm)	High (5-10 cm/yr)	Without calcareous structure	Sessile	Teixido_2024
Eudistoma banyulense	Chordata	Active filter feeders by pumping	2 - 5 years	Colonial/Modular/Gregarious	Massive encrusting	No	Heterotroph	Small (2-5 cm)	Moderate (> 1-5 cm/yr)	With calcareous structures	Sessile	Teixido_2024
Eunicella cavolini	Cnidaria	Passive filter feeders	10 - 20 years	Colonial/Modular/Gregarious	Tree-like	No	Heterotroph	Large (20-50 cm)	Moderate (> 1-5 cm/yr)	With calcareous structures	Sessile	Current_Study
Eunicella singularis	Cnidaria	Passive filter feeders	10 - 20 years	Colonial/Modular/Gregarious	Tree-like	No	Photo-heterotroph	Large (20-50 cm)	Moderate (> 1-5 cm/yr)	With calcareous structures	Sessile	Current_Study
Eunicella verrucosa	Cnidaria	Passive filter feeders	≥ 20 years	Colonial/Modular/Gregarious	Tree-like	No	Heterotroph	Large (20-50 cm)	Slow (1 cm/yr)	With calcareous structures	Sessile	Current_Study
Eupogodon sp.	Rhodophyta	Autotroph	< 1 - 1 year	Solitary	Coarse branched	No	Photosynthetic autotroph	Small (2-5 cm)	Moderate (> 1-5 cm/yr)	Without calcareous structure	Sessile	Golo_2024
Eupolymnia nebulosa	Annelida	Detritivores	2 - 5 years	Solitary	Massive encrusting	No	Heterotroph	Very small (< 2 cm)	Slow (1 cm/yr)	Without calcareous structure	Vagile	Teixido_2024
Eurypon sp.	Porifera	Active filter feeders by pumping	5 - 10 years	Colonial/Modular/Gregarious	Massive hemispheric	No	Heterotroph	Small (2-5 cm)	Slow (1 cm/yr)	Without calcareous structure	Sessile	Teixido_2024
Falkenbergia sp.	Rhodophyta	Autotroph	< 1 - 1 year	Solitary	Filamentous	No	Photosynthetic autotroph	Small (2-5 cm)	Very high (> 10 cm/yr)	Without calcareous structure	Sessile	Gomez_Gras_2021
Fasciospongia cavernosa	Porifera	Active filter feeders by pumping	5 - 10 years	Colonial/Modular/Gregarious	Encrusting, encrusting leaf-like	No	Heterotroph	Very small (< 2 cm)	Moderate (> 1-5 cm/yr)	Without calcareous structure	Sessile	Gomez_Gras_2021
Feldmannophycus rayssiae	Rhodophyta	Autotroph	2 - 5 years	Solitary	Coarse branched	No	Photosynthetic autotroph	Small (2-5 cm)	Slow (1 cm/yr)	Without calcareous structure	Sessile	Golo_2024
Flabellia petiolata	Chlorophyta	Autotroph	2 - 5 years	Colonial/Modular/Gregarious	Stolonial	No	Photosynthetic autotroph	Medium (5-20 cm)	Moderate (> 1-5 cm/yr)	Without calcareous structure	Sessile	Teixido_2024
Flabellina affinis	Mollusca	Carnivores	< 1 - 1 year	Solitary	Encrusting, encrusting leaf-like	No	Heterotroph	Small (2-5 cm)	Moderate (> 1-5 cm/yr)	Without calcareous structure	Vagile	Teixido_2024
Fulvia fragilis	Mollusca	Active filter feeders by pumping	5 - 10 years	Solitary	Massive encrusting	No	Heterotroph	Medium (5-20 cm)	Slow (1 cm/yr)	Without calcareous structure	Sessile	Current_Study
Gayliella flaccida	Rhodophyta	Autotroph	< 1 - 1 year	Colonial/Modular/Gregarious	Filamentous	No	Photosynthetic autotroph	Small (2-5 cm)	Slow (1 cm/yr)	Without calcareous structure	Sessile	Galobart_2023
Gelidium pectinatum	Rhodophyta	Autotroph	< 1 - 1 year	Solitary	Coarse branched	No	Photosynthetic autotroph	Small (2-5 cm)	Moderate (> 1-5 cm/yr)	Without calcareous structure	Sessile	Golo_2024
Gelidium pusillum	Rhodophyta	Autotroph	< 1 - 1 year	Colonial/Modular/Gregarious	Coarse branched	No	Photosynthetic autotroph	Small (2-5 cm)	High (5-10 cm/yr)	Without calcareous structure	Sessile	Teixido_2024
Gelidium serra	Rhodophyta	Autotroph	< 1 - 1 year	Colonial/Modular/Gregarious	Coarse branched	No	Photosynthetic autotroph	Small (2-5 cm)	Moderate (> 1-5 cm/yr)	Without calcareous structure	Sessile	Teixido_2024
Geodia cydonium	Porifera	Active filter feeders by pumping	≥ 20 years	Colonial/Modular/Gregarious	Massive hemispheric	No	Heterotroph	Large (20-50 cm)	Slow (1 cm/yr)	Without calcareous structure	Sessile	Current_Study
Gongolaria barbata	Ochrophyta	Autotroph	5 - 10 years	Solitary	Tree-like	Potentially / Under discussion	Photosynthetic autotroph	Very large (> 50 cm)	High (5-10 cm/yr)	Without calcareous structure	Sessile	Current_Study
Gongolaria montagnei	Ochrophyta	Autotroph	≥ 20 years	Solitary	Tree-like	Potentially / Under discussion	Photosynthetic autotroph	Large (20-50 cm)	Moderate (> 1-5 cm/yr)	Without calcareous structure	Sessile	Current_Study
Gongolaria montagnei var. tenuior	Ochrophyta	Autotroph	10 - 20 years	Solitary	Tree-like	Potentially / Under discussion	Photosynthetic autotroph	Large (20-50 cm)	High (5-10 cm/yr)	Without calcareous structure	Sessile	Galobart_2023
Gorgonians	Cnidaria	Passive filter feeders	10 - 20 years	Colonial/Modular/Gregarious	Tree-like	No	Heterotroph	Medium (5-20 cm)	Moderate (> 1-5 cm/yr)	With calcareous structures	Sessile	Current_Study
Gregarinidra gregaria	Bryozoa	Active filter feeders with cilia	5 - 10 years	Colonial/Modular/Gregarious	Encrusting, encrusting leaf-like	No	Heterotroph	Very small (< 2 cm)	Moderate (> 1-5 cm/yr)	With calcareous structures	Sessile	Gomez_Gras_2021
Griffithsia sp.	Rhodophyta	Autotroph	< 1 - 1 year	Solitary	Filamentous	No	Photosynthetic autotroph	Small (2-5 cm)	Slow (1 cm/yr)	Without calcareous structure	Sessile	Golo_2024
Hacelia attenuata	Echinodermata	Carnivores	10 - 20 years	Solitary	Massive hemispheric	No	Heterotroph	Small (2-5 cm)	Slow (1 cm/yr)	With calcareous structures	Vagile	Teixido_2024
Haliclona aquaedectus	Porifera	Active filter feeders by pumping	5 - 10 years	Colonial/Modular/Gregarious	Massive erect	No	Heterotroph	Small (2-5 cm)	Moderate (> 1-5 cm/yr)	Without calcareous structure	Sessile	Teixido_2024
Haliclona fulva	Porifera	Active filter feeders by pumping	5 - 10 years	Colonial/Modular/Gregarious	Encrusting, encrusting leaf-like	No	Heterotroph	Small (2-5 cm)	Moderate (> 1-5 cm/yr)	Without calcareous structure	Sessile	Teixido_2024
Haliclona mediterranea	Porifera	Active filter feeders by pumping	5 - 10 years	Colonial/Modular/Gregarious	Massive erect	No	Heterotroph	Medium (5-20 cm)	Moderate (> 1-5 cm/yr)	Without calcareous structure	Sessile	Teixido_2024
Haliclona mucosa	Porifera	Active filter feeders by pumping	5 - 10 years	Colonial/Modular/Gregarious	Encrusting, encrusting leaf-like	No	Heterotroph	Small (2-5 cm)	Moderate (> 1-5 cm/yr)	Without calcareous structure	Sessile	Teixido_2024
Halimeda tuna	Chlorophyta	Autotroph	5 - 10 years	Colonial/Modular/Gregarious	Stolonial	No	Photosynthetic autotroph	Medium (5-20 cm)	Moderate (> 1-5 cm/yr)	With calcareous structures	Sessile	Teixido_2024
Halocynthia papillosa	Chordata	Active filter feeders by pumping	2 - 5 years	Solitary	Massive erect	No	Heterotroph	Medium (5-20 cm)	Moderate (> 1-5 cm/yr)	Without calcareous structure	Sessile	Current_Study
Halopithys incurva	Rhodophyta	Autotroph	5 - 10 years	Solitary	Coarse branched	No	Photosynthetic autotroph	Large (20-50 cm)	Moderate (> 1-5 cm/yr)	Without calcareous structure	Sessile	Golo_2024
Halopteris filicina	Ochrophyta	Autotroph	< 1 - 1 year	Solitary	Coarse branched	No	Photosynthetic autotroph	Medium (5-20 cm)	High (5-10 cm/yr)	Without calcareous structure	Sessile	Teixido_2024
Halopteris scoparia	Ochrophyta	Autotroph	< 1 - 1 year	Solitary	Coarse branched	No	Photosynthetic autotroph	Medium (5-20 cm)	High (5-10 cm/yr)	Without calcareous structure	Sessile	Teixido_2024
Hemimycale columella	Porifera	Active filter feeders by pumping	5 - 10 years	Colonial/Modular/Gregarious	Encrusting, encrusting leaf-like	No	Heterotroph	Very small (< 2 cm)	Moderate (> 1-5 cm/yr)	Without calcareous structure	Sessile	Teixido_2024
Heterosiphonia crispella	Rhodophyta	Autotroph	< 1 - 1 year	Colonial/Modular/Gregarious	Filamentous	No	Photosynthetic autotroph	Very small (< 2 cm)	Slow (1 cm/yr)	Without calcareous structure	Sessile	Galobart_2023
Hexadella pruvotii	Porifera	Active filter feeders by pumping	5 - 10 years	Colonial/Modular/Gregarious	Encrusting, encrusting leaf-like	No	Heterotroph	Very small (< 2 cm)	Moderate (> 1-5 cm/yr)	Without calcareous structure	Sessile	Teixido_2024
Hexadella racovitzai	Porifera	Active filter feeders by pumping	5 - 10 years	Colonial/Modular/Gregarious	Encrusting, encrusting leaf-like	No	Heterotroph	Very small (< 2 cm)	Moderate (> 1-5 cm/yr)	Without calcareous structure	Sessile	Teixido_2024
Hexaplex trunculus	Mollusca	Carnivores	2 - 5 years	Solitary	Massive hemispheric	No	Heterotroph	Small (2-5 cm)	Slow (1 cm/yr)	With calcareous structures	Vagile	Teixido_2024
Hildenbrandia crouaniorum	Rhodophyta	Autotroph	10 - 20 years	Solitary	Encrusting, encrusting leaf-like	No	Photosynthetic autotroph	Very small (< 2 cm)	Slow (1 cm/yr)	Without calcareous structure	Sessile	Teixido_2024
Hildenbrandia rubra	Rhodophyta	Autotroph	10 - 20 years	Solitary	Encrusting, encrusting leaf-like	No	Photosynthetic autotroph	Very small (< 2 cm)	Slow (1 cm/yr)	Without calcareous structure	Sessile	Gomez_Gras_2021
Hippospongia communis	Porifera	Active filter feeders by pumping	≥ 20 years	Colonial/Modular/Gregarious	Massive hemispheric	No	Heterotroph	Large (20-50 cm)	Slow (1 cm/yr)	Without calcareous structure	Sessile	Current_Study
Holothuria forskali	Echinodermata	Detritivores	10 - 20 years	Solitary	Massive hemispheric	No	Heterotroph	Medium (5-20 cm)	Moderate (> 1-5 cm/yr)	With calcareous structures	Vagile	Teixido_2024
Holothuria poli	Echinodermata	Detritivores	2 - 5 years	Solitary	Massive hemispheric	No	Heterotroph	Small (2-5 cm)	Moderate (> 1-5 cm/yr)	Without calcareous structure	Vagile	Current_Study
Hoplangia durotrix	Cnidaria	Passive filter feeders	10 - 20 years	Colonial/Modular/Gregarious	Massive encrusting	No	Heterotroph	Very small (< 2 cm)	Slow (1 cm/yr)	With calcareous structures	Sessile	Teixido_2024
Hydrolithon farinosum	Rhodophyta	Autotroph	< 1 - 1 year	Solitary	Encrusting, encrusting leaf-like	No	Photosynthetic autotroph	Very small (< 2 cm)	Very high (> 10 cm/yr)	With calcareous structures	Sessile	Teixido_2024
Hydrozoa unidentified	Cnidaria	Passive filter feeders	< 1 - 1 year	Colonial/Modular/Gregarious	Filamentous	No	Heterotroph	Small (2-5 cm)	Moderate (> 1-5 cm/yr)	Without calcareous structure	Sessile	Teixido_2024
Hymedesmia sp.	Porifera	Active filter feeders by pumping	5 - 10 years	Colonial/Modular/Gregarious	Encrusting, encrusting leaf-like	No	Heterotroph	Very small (< 2 cm)	Slow (1 cm/yr)	Without calcareous structure	Sessile	Teixido_2024
Hymedesmia versicolor	Porifera	Active filter feeders by pumping	5 - 10 years	Colonial/Modular/Gregarious	Encrusting, encrusting leaf-like	No	Heterotroph	Very small (< 2 cm)	Slow (1 cm/yr)	Without calcareous structure	Sessile	Teixido_2024
Hypoglossum hypoglossoides	Rhodophyta	Autotroph	< 1 - 1 year	Solitary	Foliose-erect	No	Photosynthetic autotroph	Very small (< 2 cm)	Slow (1 cm/yr)	Without calcareous structure	Sessile	Golo_2024
Idmidronea sp.	Bryozoa	Active filter feeders with cilia	2 - 5 years	Colonial/Modular/Gregarious	Tree-like	No	Heterotroph	Very small (< 2 cm)	Moderate (> 1-5 cm/yr)	With calcareous structures	Sessile	Gomez_Gras_2021
Ircinia dendroides	Porifera	Active filter feeders by pumping	10 - 20 years	Colonial/Modular/Gregarious	Massive hemispheric	No	Photo-heterotroph	Small (2-5 cm)	Slow (1 cm/yr)	Without calcareous structure	Sessile	Teixido_2024
Ircinia oros	Porifera	Active filter feeders by pumping	10 - 20 years	Colonial/Modular/Gregarious	Massive hemispheric	No	Photo-heterotroph	Large (20-50 cm)	Slow (1 cm/yr)	Without calcareous structure	Sessile	Current_Study
Ircinia spp.	Porifera	Active filter feeders by pumping	10 - 20 years	Colonial/Modular/Gregarious	Massive hemispheric	No	Photo-heterotroph	Large (20-50 cm)	Moderate (> 1-5 cm/yr)	Without calcareous structure	Sessile	Current_Study
Ircinia variabilis	Porifera	Active filter feeders by pumping	10 - 20 years	Colonial/Modular/Gregarious	Massive hemispheric	No	Photo-heterotroph	Large (20-50 cm)	Slow (1 cm/yr)	Without calcareous structure	Sessile	Current_Study
Jania pedunculata var. adhaerens	Rhodophyta	Autotroph	< 1 - 1 year	Solitary	Articulated	No	Photosynthetic autotroph	Very small (< 2 cm)	Moderate (> 1-5 cm/yr)	With calcareous structures	Sessile	Galobart_2023
Jania rubens	Rhodophyta	Autotroph	< 1 - 1 year	Colonial/Modular/Gregarious	Articulated	No	Photosynthetic autotroph	Small (2-5 cm)	High (5-10 cm/yr)	With calcareous structures	Sessile	Current_Study
Jania virgata	Rhodophyta	Autotroph	< 1 - 1 year	Solitary	Articulated	No	Photosynthetic autotroph	Small (2-5 cm)	High (5-10 cm/yr)	With calcareous structures	Sessile	Golo_2024
Laurencia cf. chondrioides	Rhodophyta	Autotroph	< 1 - 1 year	Solitary	Coarse branched	No	Photosynthetic autotroph	Small (2-5 cm)	Moderate (> 1-5 cm/yr)	Without calcareous structure	Sessile	Teixido_2024
Laurencia obtusa	Rhodophyta	Autotroph	< 1 - 1 year	Colonial/Modular/Gregarious	Coarse branched	No	Photosynthetic autotroph	Medium (5-20 cm)	High (5-10 cm/yr)	Without calcareous structure	Sessile	Galobart_2023
Laurencia sp.	Rhodophyta	Autotroph	< 1 - 1 year	Solitary	Coarse branched	No	Photosynthetic autotroph	Small (2-5 cm)	Moderate (> 1-5 cm/yr)	Without calcareous structure	Sessile	Teixido_2024
Leptogorgia sarmentosa	Cnidaria	Passive filter feeders	≥ 20 years	Colonial/Modular/Gregarious	Tree-like	No	Heterotroph	Large (20-50 cm)	Slow (1 cm/yr)	With calcareous structures	Sessile	Current_Study
Leptopsammia pruvoti	Cnidaria	Passive filter feeders	≥ 20 years	Colonial/Modular/Gregarious	Cup-like	No	Heterotroph	Small (2-5 cm)	Slow (1 cm/yr)	With calcareous structures	Sessile	Current_Study
Liagora sp.	Rhodophyta	Autotroph	2 - 5 years	Solitary	Articulated	No	Photosynthetic autotroph	Small (2-5 cm)	High (5-10 cm/yr)	With calcareous structures	Sessile	Gomez_Gras_2021
Lichenopora radiata	Bryozoa	Active filter feeders with cilia	< 1 - 1 year	Colonial/Modular/Gregarious	Encrusting, encrusting leaf-like	No	Heterotroph	Very small (< 2 cm)	High (5-10 cm/yr)	With calcareous structures	Sessile	Teixido_2024
Lissoclinum perforatum	Chordata	Active filter feeders by pumping	2 - 5 years	Colonial/Modular/Gregarious	Encrusting, encrusting leaf-like	No	Heterotroph	Very small (< 2 cm)	Moderate (> 1-5 cm/yr)	With calcareous structures	Sessile	Teixido_2024
Lithophyllum byssoides	Rhodophyta	Autotroph	10 - 20 years	Solitary	Encrusting, encrusting leaf-like	No	Photosynthetic autotroph	Very small (< 2 cm)	Extreme slow (< 1 cm/yr)	With calcareous structures	Sessile	Current_Study
Lithophyllum incrustans	Rhodophyta	Autotroph	10 - 20 years	Solitary	Encrusting, encrusting leaf-like	No	Photosynthetic autotroph	Very small (< 2 cm)	Slow (1 cm/yr)	With calcareous structures	Sessile	Current_Study
Lithophyllum sp.	Rhodophyta	Autotroph	10 - 20 years	Solitary	Encrusting, encrusting leaf-like	No	Photosynthetic autotroph	Very small (< 2 cm)	Slow (1 cm/yr)	With calcareous structures	Sessile	Current_Study
Lithophyllum stictiforme	Rhodophyta	Autotroph	10 - 20 years	Solitary	Encrusting, encrusting leaf-like	No	Photosynthetic autotroph	Very small (< 2 cm)	Slow (1 cm/yr)	With calcareous structures	Sessile	Current_Study
Lobophora variegata	Ochrophyta	Autotroph	< 1 - 1 year	Solitary	Encrusting, encrusting leaf-like	No	Photosynthetic autotroph	Very small (< 2 cm)	High (5-10 cm/yr)	Without calcareous structure	Sessile	Teixido_2024
Lomentaria chylocladiella	Rhodophyta	Autotroph	< 1 - 1 year	Solitary	Filamentous	No	Photosynthetic autotroph	Very small (< 2 cm)	Extreme slow (< 1 cm/yr)	Without calcareous structure	Sessile	Golo_2024
Lophocladia lallemandii	Rhodophyta	Autotroph	< 1 - 1 year	Solitary	Filamentous	No	Photosynthetic autotroph	Large (20-50 cm)	Very high (> 10 cm/yr)	Without calcareous structure	Sessile	Golo_2024
Lophosiphonia cristata	Rhodophyta	Autotroph	< 1 - 1 year	Colonial/Modular/Gregarious	Filamentous	No	Photosynthetic autotroph	Very small (< 2 cm)	Slow (1 cm/yr)	Without calcareous structure	Sessile	Galobart_2023
Lophosiphonia obscura	Rhodophyta	Autotroph	< 1 - 1 year	Colonial/Modular/Gregarious	Filamentous	No	Photosynthetic autotroph	Very small (< 2 cm)	Slow (1 cm/yr)	Without calcareous structure	Sessile	Galobart_2023
Lophosiphonia sp.	Rhodophyta	Autotroph	< 1 - 1 year	Colonial/Modular/Gregarious	Filamentous	No	Photosynthetic autotroph	Very small (< 2 cm)	Slow (1 cm/yr)	Without calcareous structure	Sessile	Galobart_2023
Madracis pharensis	Cnidaria	Passive filter feeders	10 - 20 years	Colonial/Modular/Gregarious	Massive encrusting	No	Photo-heterotroph	Small (2-5 cm)	Slow (1 cm/yr)	With calcareous structures	Sessile	Current_Study
Margaretta cereoides	Bryozoa	Active filter feeders with cilia	2 - 5 years	Colonial/Modular/Gregarious	Tree-like	No	Heterotroph	Small (2-5 cm)	Moderate (> 1-5 cm/yr)	With calcareous structures	Sessile	Teixido_2024
Meredithia microphylla	Rhodophyta	Autotroph	< 1 - 1 year	Solitary	Foliose-erect	No	Photosynthetic autotroph	Medium (5-20 cm)	Moderate (> 1-5 cm/yr)	Without calcareous structure	Sessile	Teixido_2024
Merlia deficiens	Porifera	Active filter feeders by pumping	10 - 20 years	Colonial/Modular/Gregarious	Encrusting, encrusting leaf-like	No	Heterotroph	Very small (< 2 cm)	Extreme slow (< 1 cm/yr)	With calcareous structures	Sessile	Teixido_2024
Merlia lipoclavidisca	Porifera	Active filter feeders by pumping	≥ 20 years	Colonial/Modular/Gregarious	Encrusting, encrusting leaf-like	No	Heterotroph	Very small (< 2 cm)	Extreme slow (< 1 cm/yr)	With calcareous structures	Sessile	Teixido_2024
Merlia normani	Porifera	Active filter feeders by pumping	≥ 20 years	Colonial/Modular/Gregarious	Encrusting, encrusting leaf-like	No	Heterotroph	Very small (< 2 cm)	Extreme slow (< 1 cm/yr)	With calcareous structures	Sessile	Teixido_2024
Mesophyllum alternans	Rhodophyta	Autotroph	5 - 10 years	Solitary	Encrusting, encrusting leaf-like	No	Photosynthetic autotroph	Very small (< 2 cm)	Moderate (> 1-5 cm/yr)	With calcareous structures	Sessile	Teixido_2024
Mesophyllum spp.	Rhodophyta	Autotroph	10 - 20 years	Solitary	Encrusting, encrusting leaf-like	No	Photosynthetic autotroph	Small (2-5 cm)	Moderate (> 1-5 cm/yr)	With calcareous structures	Sessile	Current_Study
Microciona sp.	Porifera	Active filter feeders by pumping	5 - 10 years	Colonial/Modular/Gregarious	Encrusting, encrusting leaf-like	No	Heterotroph	Very small (< 2 cm)	Slow (1 cm/yr)	Without calcareous structure	Sessile	Teixido_2024
Microcosmus spp.	Chordata	Active filter feeders by pumping	2 - 5 years	Solitary	Massive erect	No	Heterotroph	Medium (5-20 cm)	Moderate (> 1-5 cm/yr)	Without calcareous structure	Sessile	Current_Study
Microdictyon sp.	Chlorophyta	Autotroph	5 - 10 years	Solitary	Encrusting, encrusting leaf-like	No	Photosynthetic autotroph	Very small (< 2 cm)	Slow (1 cm/yr)	Without calcareous structure	Sessile	Golo_2024
Microdictyon tenuius	Chlorophyta	Autotroph	< 1 - 1 year	Solitary	Foliose-erect	No	Photosynthetic autotroph	Medium (5-20 cm)	High (5-10 cm/yr)	Without calcareous structure	Sessile	Teixido_2024
Mimosella gracilis	Bryozoa	Active filter feeders with cilia	< 1 - 1 year	Colonial/Modular/Gregarious	Filamentous	No	Heterotroph	Very small (< 2 cm)	Moderate (> 1-5 cm/yr)	Without calcareous structure	Sessile	Teixido_2024
Miniacina miniacea	Foraminifera	Active filter feeders with cilia	< 1 - 1 year	Solitary	Foliose-erect	No	Heterotroph	Very small (< 2 cm)	Slow (1 cm/yr)	With calcareous structures	Sessile	Teixido_2024
Monosporus pedicellatus	Rhodophyta	Autotroph	< 1 - 1 year	Solitary	Filamentous	No	Photosynthetic autotroph	Small (2-5 cm)	Slow (1 cm/yr)	Without calcareous structure	Sessile	Golo_2024
Myriapora truncata	Bryozoa	Active filter feeders with cilia	10 - 20 years	Colonial/Modular/Gregarious	Tree-like	No	Heterotroph	Small (2-5 cm)	Moderate (> 1-5 cm/yr)	With calcareous structures	Sessile	Current_Study
Myriogramme sp.	Rhodophyta	Autotroph	5 - 10 years	Solitary	Tree-like	No	Photosynthetic autotroph	Small (2-5 cm)	Moderate (> 1-5 cm/yr)	With calcareous structures	Sessile	Golo_2024
Mytilus galloprovincialis	Mollusca	Active filter feeders by pumping	2 - 5 years	Solitary	Massive hemispheric	No	Heterotroph	Small (2-5 cm)	Moderate (> 1-5 cm/yr)	With calcareous structures	Sessile	Teixido_2024
Myxicola aesthetica	Annelida	Active filter feeders with cilia	2 - 5 years	Solitary	Encrusting, encrusting leaf-like	No	Heterotroph	Small (2-5 cm)	Slow (1 cm/yr)	Without calcareous structure	Sessile	Teixido_2024
Myxilla rosacea	Porifera	Active filter feeders by pumping	2 - 5 years	Colonial/Modular/Gregarious	Encrusting, encrusting leaf-like	No	Heterotroph	Very small (< 2 cm)	Moderate (> 1-5 cm/yr)	Without calcareous structure	Sessile	Teixido_2024
Neogoniolithon brassica-florida	Rhodophyta	Autotroph	10 - 20 years	Solitary	Encrusting, encrusting leaf-like	No	Photosynthetic autotroph	Very small (< 2 cm)	Moderate (> 1-5 cm/yr)	With calcareous structures	Sessile	Teixido_2024
Neogoniolithon mamillosum	Rhodophyta	Autotroph	10 - 20 years	Solitary	Encrusting, encrusting leaf-like	No	Photosynthetic autotroph	Very small (< 2 cm)	Slow (1 cm/yr)	With calcareous structures	Sessile	Current_Study
Nereia filiformis	Ochrophyta	Autotroph	< 1 - 1 year	Solitary	Coarse branched	No	Photosynthetic autotroph	Medium (5-20 cm)	Moderate (> 1-5 cm/yr)	Without calcareous structure	Sessile	Teixido_2024
Ophiothrix fragilis	Echinodermata	Carnivores	2 - 5 years	Solitary	Coarse branched	No	Heterotroph	Very small (< 2 cm)	Slow (1 cm/yr)	With calcareous structures	Vagile	Teixido_2024
Oscarella sp.	Porifera	Active filter feeders by pumping	5 - 10 years	Colonial/Modular/Gregarious	Massive encrusting	No	Heterotroph	Small (2-5 cm)	Moderate (> 1-5 cm/yr)	Without calcareous structure	Sessile	Gomez_Gras_2021
Osmundaria volubilis	Rhodophyta	Autotroph	5 - 10 years	Solitary	Coarse branched	No	Photosynthetic autotroph	Large (20-50 cm)	High (5-10 cm/yr)	Without calcareous structure	Sessile	Golo_2024
Osmundea pelagosae	Rhodophyta	Autotroph	2 - 5 years	Solitary	Coarse branched	No	Photosynthetic autotroph	Small (2-5 cm)	Moderate (> 1-5 cm/yr)	Without calcareous structure	Sessile	Golo_2024
Padina pavonica	Ochrophyta	Autotroph	< 1 - 1 year	Solitary	Foliose-erect	No	Photosynthetic autotroph	Medium (5-20 cm)	High (5-10 cm/yr)	With calcareous structures	Sessile	Teixido_2024
Palinurus elephas	Arthropoda	Carnivores	10 - 20 years	Solitary	Massive hemispheric	No	Heterotroph	Large (20-50 cm)	Moderate (> 1-5 cm/yr)	With calcareous structures	Vagile	Teixido_2024
Palmophyllum crassum	Chlorophyta	Autotroph	5 - 10 years	Colonial/Modular/Gregarious	Encrusting, encrusting leaf-like	No	Photosynthetic autotroph	Very small (< 2 cm)	Slow (1 cm/yr)	Without calcareous structure	Sessile	Teixido_2024
Paracentrotus lividus	Echinodermata	Herbivores / Grazers	10 - 20 years	Solitary	Massive encrusting	No	Heterotroph	Small (2-5 cm)	Slow (1 cm/yr)	With calcareous structures	Vagile	Current_Study
Paraflabellina ischitana	Mollusca	Carnivores	< 1 - 1 year	Solitary	Encrusting, encrusting leaf-like	No	Heterotroph	Small (2-5 cm)	Moderate (> 1-5 cm/yr)	Without calcareous structure	Vagile	Teixido_2024
Paramuricea clavata	Cnidaria	Passive filter feeders	≥ 20 years	Colonial/Modular/Gregarious	Tree-like	No	Heterotroph	Very large (> 50 cm)	Slow (1 cm/yr)	With calcareous structures	Sessile	Current_Study
Parazoanthus axinellae	Cnidaria	Passive filter feeders	10 - 20 years	Colonial/Modular/Gregarious	Massive encrusting	No	Heterotroph	Very small (< 2 cm)	Moderate (> 1-5 cm/yr)	With calcareous structures	Sessile	Current_Study
Parvocaulis parvulus	Chlorophyta	Autotroph	< 1 - 1 year	Solitary	Filamentous	No	Photosynthetic autotroph	Very small (< 2 cm)	Slow (1 cm/yr)	With calcareous structures	Sessile	Teixido_2024
Patella coerulea	Mollusca	Herbivores / Grazers	5 - 10 years	Solitary	Massive encrusting	No	Heterotroph	Very small (< 2 cm)	Slow (1 cm/yr)	With calcareous structures	Vagile	Teixido_2024
Pedobesia simplex	Chlorophyta	Autotroph	< 1 - 1 year	Solitary	Filamentous	No	Photosynthetic autotroph	Small (2-5 cm)	High (5-10 cm/yr)	Without calcareous structure	Sessile	Teixido_2024
Pentapora fascialis	Bryozoa	Active filter feeders with cilia	10 - 20 years	Colonial/Modular/Gregarious	Tree-like	No	Heterotroph	Small (2-5 cm)	Moderate (> 1-5 cm/yr)	With calcareous structures	Sessile	Current_Study
Pentapora ottomuelleriana	Bryozoa	Active filter feeders with cilia	5 - 10 years	Colonial/Modular/Gregarious	Encrusting, encrusting leaf-like	No	Heterotroph	Very small (< 2 cm)	Moderate (> 1-5 cm/yr)	With calcareous structures	Sessile	Teixido_2024
Perforatus perforatus	Arthropoda	Active filter feeders with cilia	2 - 5 years	Solitary	Massive hemispheric	No	Heterotroph	Very small (< 2 cm)	Moderate (> 1-5 cm/yr)	With calcareous structures	Sessile	Teixido_2024
Petrosia ficiformis	Porifera	Active filter feeders by pumping	≥ 20 years	Colonial/Modular/Gregarious	Massive encrusting	No	Photo-heterotroph	Large (20-50 cm)	Slow (1 cm/yr)	Without calcareous structure	Sessile	Current_Study
Peyssonnelia bornetii	Rhodophyta	Autotroph	< 1 - 1 year	Solitary	Encrusting, encrusting leaf-like	No	Photosynthetic autotroph	Very small (< 2 cm)	Moderate (> 1-5 cm/yr)	Without calcareous structure	Sessile	Teixido_2024
Peyssonnelia rosa-marina	Rhodophyta	Autotroph	5 - 10 years	Solitary	Encrusting, encrusting leaf-like	No	Photosynthetic autotroph	Very small (< 2 cm)	Slow (1 cm/yr)	With calcareous structures	Sessile	Teixido_2024
Peyssonnelia rubra	Rhodophyta	Autotroph	< 1 - 1 year	Solitary	Encrusting, encrusting leaf-like	No	Photosynthetic autotroph	Very small (< 2 cm)	Moderate (> 1-5 cm/yr)	Without calcareous structure	Sessile	Teixido_2024
Peyssonnelia sp.	Rhodophyta	Autotroph	10 - 20 years	Solitary	Encrusting, encrusting leaf-like	No	Photosynthetic autotroph	Very small (< 2 cm)	Moderate (> 1-5 cm/yr)	With calcareous structures	Sessile	Current_Study
Peyssonnelia squamaria	Rhodophyta	Autotroph	< 1 - 1 year	Solitary	Encrusting, encrusting leaf-like	No	Photosynthetic autotroph	Very small (< 2 cm)	Moderate (> 1-5 cm/yr)	Without calcareous structure	Sessile	Teixido_2024
Phallusia mammillata	Chordata	Active filter feeders by pumping	2 - 5 years	Solitary	Massive erect	No	Heterotroph	Medium (5-20 cm)	Moderate (> 1-5 cm/yr)	Without calcareous structure	Sessile	Current_Study
Pherusella cf. tubulosa	Bryozoa	Active filter feeders with cilia	2 - 5 years	Colonial/Modular/Gregarious	Foliose-erect	No	Heterotroph	Small (2-5 cm)	Moderate (> 1-5 cm/yr)	Without calcareous structure	Sessile	Teixido_2024
Phorbas sp.	Porifera	Active filter feeders by pumping	2 - 5 years	Colonial/Modular/Gregarious	Encrusting, encrusting leaf-like	No	Heterotroph	Very small (< 2 cm)	Slow (1 cm/yr)	Without calcareous structure	Sessile	Golo_2024
Phorbas tenacior	Porifera	Active filter feeders by pumping	10 - 20 years	Colonial/Modular/Gregarious	Encrusting, encrusting leaf-like	No	Heterotroph	Very small (< 2 cm)	Moderate (> 1-5 cm/yr)	Without calcareous structure	Sessile	Teixido_2024
Phorbas topsenti	Porifera	Active filter feeders by pumping	10 - 20 years	Colonial/Modular/Gregarious	Encrusting, encrusting leaf-like	No	Heterotroph	Very small (< 2 cm)	Moderate (> 1-5 cm/yr)	Without calcareous structure	Sessile	Current_Study
Phyllophora crispa	Rhodophyta	Autotroph	5 - 10 years	Solitary	Coarse branched	No	Photosynthetic autotroph	Large (20-50 cm)	High (5-10 cm/yr)	Without calcareous structure	Sessile	Golo_2024
Pinna nobilis	Mollusca	Active filter feeders by pumping	≥ 20 years	Solitary	Massive erect	No	Heterotroph	Very large (> 50 cm)	Slow (1 cm/yr)	With calcareous structures	Sessile	Current_Study
Plakina sp.	Porifera	Active filter feeders by pumping	5 - 10 years	Colonial/Modular/Gregarious	Encrusting, encrusting leaf-like	No	Heterotroph	Very small (< 2 cm)	Moderate (> 1-5 cm/yr)	Without calcareous structure	Sessile	Gomez_Gras_2021
Pleraplysilla spinifera	Porifera	Active filter feeders by pumping	5 - 10 years	Colonial/Modular/Gregarious	Encrusting, encrusting leaf-like	No	Heterotroph	Very small (< 2 cm)	Moderate (> 1-5 cm/yr)	Without calcareous structure	Sessile	Teixido_2024
Plocamium cartilagineum	Rhodophyta	Autotroph	< 1 - 1 year	Solitary	Coarse branched	No	Photosynthetic autotroph	Small (2-5 cm)	Moderate (> 1-5 cm/yr)	Without calcareous structure	Sessile	Golo_2024
Polychaeta unidentified	Annelida	Carnivores	< 1 - 1 year	Solitary	Encrusting, encrusting leaf-like	No	Heterotroph	Very small (< 2 cm)	Slow (1 cm/yr)	Without calcareous structure	Vagile	Teixido_2024
Polycyathus muellerae	Cnidaria	Passive filter feeders	10 - 20 years	Colonial/Modular/Gregarious	Massive encrusting	No	Heterotroph	Very small (< 2 cm)	Slow (1 cm/yr)	With calcareous structures	Sessile	Current_Study
Polysiphonia scopulorum	Rhodophyta	Autotroph	< 1 - 1 year	Colonial/Modular/Gregarious	Filamentous	No	Photosynthetic autotroph	Very small (< 2 cm)	Moderate (> 1-5 cm/yr)	Without calcareous structure	Sessile	Galobart_2023
Polysiphonia sp.	Rhodophyta	Autotroph	< 1 - 1 year	Solitary	Filamentous	No	Photosynthetic autotroph	Small (2-5 cm)	Moderate (> 1-5 cm/yr)	Without calcareous structure	Sessile	Golo_2024
Polysyncraton lacazei	Chordata	Active filter feeders by pumping	2 - 5 years	Colonial/Modular/Gregarious	Massive encrusting	No	Heterotroph	Small (2-5 cm)	Moderate (> 1-5 cm/yr)	With calcareous structures	Sessile	Teixido_2024
Polysyncraton lacazei elegans	Chordata	Active filter feeders by pumping	2 - 5 years	Colonial/Modular/Gregarious	Massive encrusting	No	Heterotroph	Small (2-5 cm)	Moderate (> 1-5 cm/yr)	With calcareous structures	Sessile	Teixido_2024
Posidonia oceanica	Tracheophyta	Autotroph	≥ 20 years	Colonial/Modular/Gregarious	Tree-like	Yes	Photosynthetic autotroph	Very large (> 50 cm)	Slow (1 cm/yr)	Without calcareous structure	Sessile	Current_Study
Prostheceraeus roseus	Platyhelminthes	Carnivores	< 1 - 1 year	Solitary	Encrusting, encrusting leaf-like	No	Heterotroph	Very small (< 2 cm)	Slow (1 cm/yr)	Without calcareous structure	Vagile	Teixido_2024
Prosuberites longispinus	Porifera	Active filter feeders by pumping	5 - 10 years	Colonial/Modular/Gregarious	Encrusting, encrusting leaf-like	No	Heterotroph	Very small (< 2 cm)	Moderate (> 1-5 cm/yr)	Without calcareous structure	Sessile	Gomez_Gras_2021
Protula sp.	Annelida	Active filter feeders with cilia	5 - 10 years	Solitary	Massive erect	No	Heterotroph	Small (2-5 cm)	Slow (1 cm/yr)	With calcareous structures	Sessile	Teixido_2024
Pseudochlorodesmis furcellata	Chlorophyta	Autotroph	< 1 - 1 year	Colonial/Modular/Gregarious	Stolonial	No	Photosynthetic autotroph	Small (2-5 cm)	Moderate (> 1-5 cm/yr)	Without calcareous structure	Sessile	Teixido_2024
Pseudolithoderma adriaticum	Ochrophyta	Autotroph	5 - 10 years	Solitary	Encrusting, encrusting leaf-like	No	Photosynthetic autotroph	Very small (< 2 cm)	Slow (1 cm/yr)	Without calcareous structure	Sessile	Teixido_2024
Puellina radiata	Bryozoa	Active filter feeders with cilia	< 1 - 1 year	Colonial/Modular/Gregarious	Encrusting, encrusting leaf-like	No	Heterotroph	Very small (< 2 cm)	Moderate (> 1-5 cm/yr)	With calcareous structures	Sessile	Teixido_2024
Pycnoclavella sp.	Chordata	Active filter feeders by pumping	< 1 - 1 year	Colonial/Modular/Gregarious	Massive encrusting	No	Heterotroph	Very small (< 2 cm)	Slow (1 cm/yr)	Without calcareous structure	Sessile	Teixido_2024
Pyura dura	Chordata	Active filter feeders by pumping	5 - 10 years	Colonial/Modular/Gregarious	Massive erect	No	Heterotroph	Medium (5-20 cm)	Slow (1 cm/yr)	With calcareous structures	Sessile	Teixido_2024
Raspaciona aculeata	Porifera	Active filter feeders by pumping	5 - 10 years	Colonial/Modular/Gregarious	Encrusting, encrusting leaf-like	No	Heterotroph	Very small (< 2 cm)	Slow (1 cm/yr)	Without calcareous structure	Sessile	Teixido_2024
Reptadeonella violacea	Bryozoa	Active filter feeders with cilia	2 - 5 years	Colonial/Modular/Gregarious	Encrusting, encrusting leaf-like	No	Heterotroph	Very small (< 2 cm)	Slow (1 cm/yr)	With calcareous structures	Sessile	Teixido_2024
Reteporella grimaldii	Bryozoa	Active filter feeders with cilia	5 - 10 years	Colonial/Modular/Gregarious	Massive hemispheric	No	Heterotroph	Small (2-5 cm)	Moderate (> 1-5 cm/yr)	With calcareous structures	Sessile	Current_Study
Reteporella spp.	Bryozoa	Active filter feeders with cilia	5 - 10 years	Colonial/Modular/Gregarious	Massive hemispheric	No	Heterotroph	Small (2-5 cm)	Moderate (> 1-5 cm/yr)	With calcareous structures	Sessile	Current_Study
Rhodophyllis divaricata	Rhodophyta	Autotroph	< 1 - 1 year	Solitary	Foliose-erect	No	Photosynthetic autotroph	Small (2-5 cm)	High (5-10 cm/yr)	Without calcareous structure	Sessile	Teixido_2024
Rhodymenia ardissonei	Rhodophyta	Autotroph	2 - 5 years	Solitary	Coarse branched	No	Photosynthetic autotroph	Small (2-5 cm)	Moderate (> 1-5 cm/yr)	Without calcareous structure	Sessile	Teixido_2024
Rhodymenia sp.	Rhodophyta	Autotroph	2 - 5 years	Solitary	Coarse branched	No	Photosynthetic autotroph	Small (2-5 cm)	Moderate (> 1-5 cm/yr)	Without calcareous structure	Sessile	Golo_2024
Rhynchozoon bispinosum	Bryozoa	Active filter feeders with cilia	5 - 10 years	Colonial/Modular/Gregarious	Encrusting, encrusting leaf-like	No	Heterotroph	Very small (< 2 cm)	Moderate (> 1-5 cm/yr)	With calcareous structures	Sessile	Teixido_2024
Rhynchozoon neapolitanum	Bryozoa	Active filter feeders with cilia	5 - 10 years	Colonial/Modular/Gregarious	Encrusting, encrusting leaf-like	No	Heterotroph	Very small (< 2 cm)	Moderate (> 1-5 cm/yr)	With calcareous structures	Sessile	Teixido_2024
Rocellaria dubia	Mollusca	Active filter feeders by pumping	5 - 10 years	Solitary	Massive encrusting	No	Heterotroph	Small (2-5 cm)	Slow (1 cm/yr)	With calcareous structures	Sessile	Teixido_2024
Rodriguezella sp.	Rhodophyta	Autotroph	2 - 5 years	Solitary	Coarse branched	No	Photosynthetic autotroph	Small (2-5 cm)	Moderate (> 1-5 cm/yr)	Without calcareous structure	Sessile	Golo_2024
Ruditapes decussatus	Mollusca	Active filter feeders by pumping	5 - 10 years	Solitary	Massive encrusting	No	Heterotroph	Medium (5-20 cm)	Slow (1 cm/yr)	With calcareous structures	Sessile	Current_Study
Rytiphlaea tinctoria	Rhodophyta	Autotroph	2 - 5 years	Solitary	Coarse branched	No	Photosynthetic autotroph	Small (2-5 cm)	Moderate (> 1-5 cm/yr)	Without calcareous structure	Sessile	Golo_2024
Sabella sp.	Annelida	Active filter feeders with cilia	5 - 10 years	Solitary	Tree-like	No	Heterotroph	Medium (5-20 cm)	Moderate (> 1-5 cm/yr)	Without calcareous structure	Sessile	Teixido_2024
Sabella spallanzani	Annelida	Active filter feeders with cilia	5 - 10 years	Solitary	Tree-like	No	Heterotroph	Large (20-50 cm)	Moderate (> 1-5 cm/yr)	Without calcareous structure	Sessile	Teixido_2024
Salmacina dysteri	Annelida	Active filter feeders with cilia	< 1 - 1 year	Colonial/Modular/Gregarious	Filamentous	No	Heterotroph	Very small (< 2 cm)	High (5-10 cm/yr)	With calcareous structures	Sessile	Teixido_2024
Sarcotragus fasciculatus	Porifera	Active filter feeders by pumping	≥ 20 years	Colonial/Modular/Gregarious	Massive hemispheric	No	Photo-heterotroph	Medium (5-20 cm)	Slow (1 cm/yr)	Without calcareous structure	Sessile	Current_Study
Sarcotragus foetidus	Porifera	Active filter feeders by pumping	≥ 20 years	Colonial/Modular/Gregarious	Massive erect	No	Heterotroph	Large (20-50 cm)	Slow (1 cm/yr)	Without calcareous structure	Sessile	Current_Study
Sarcotragus spinosulus	Porifera	Active filter feeders by pumping	≥ 20 years	Colonial/Modular/Gregarious	Massive hemispheric	No	Heterotroph	Medium (5-20 cm)	Moderate (> 1-5 cm/yr)	Without calcareous structure	Sessile	Teixido_2024
Sarcotragus spp.	Porifera	Active filter feeders by pumping	≥ 20 years	Colonial/Modular/Gregarious	Massive erect	No	Heterotroph	Large (20-50 cm)	Slow (1 cm/yr)	Without calcareous structure	Sessile	Current_Study
Sargassum vulgare	Ochrophyta	Autotroph	5 - 10 years	Solitary	Tree-like	No	Photosynthetic autotroph	Large (20-50 cm)	High (5-10 cm/yr)	Without calcareous structure	Sessile	Teixido_2024
Savignyella lafontii	Bryozoa	Active filter feeders with cilia	< 1 - 1 year	Colonial/Modular/Gregarious	Filamentous	No	Heterotroph	Small (2-5 cm)	Moderate (> 1-5 cm/yr)	With calcareous structures	Sessile	Teixido_2024
Schizobrachiella sanguinea	Bryozoa	Active filter feeders with cilia	2 - 5 years	Colonial/Modular/Gregarious	Encrusting, encrusting leaf-like	No	Heterotroph	Very small (< 2 cm)	Moderate (> 1-5 cm/yr)	With calcareous structures	Sessile	Current_Study
Schizomavella linearis	Bryozoa	Active filter feeders with cilia	5 - 10 years	Colonial/Modular/Gregarious	Encrusting, encrusting leaf-like	No	Heterotroph	Very small (< 2 cm)	Moderate (> 1-5 cm/yr)	With calcareous structures	Sessile	Gomez_Gras_2021
Schizomavella mamillata	Bryozoa	Active filter feeders with cilia	5 - 10 years	Colonial/Modular/Gregarious	Encrusting, encrusting leaf-like	No	Heterotroph	Very small (< 2 cm)	Moderate (> 1-5 cm/yr)	With calcareous structures	Sessile	Teixido_2024
Schizoporella cf. errata	Bryozoa	Active filter feeders with cilia	2 - 5 years	Colonial/Modular/Gregarious	Encrusting, encrusting leaf-like	No	Heterotroph	Very small (< 2 cm)	High (5-10 cm/yr)	With calcareous structures	Sessile	Teixido_2024
Schizoporella dunkeri	Bryozoa	Active filter feeders with cilia	2 - 5 years	Colonial/Modular/Gregarious	Encrusting, encrusting leaf-like	No	Heterotroph	Very small (< 2 cm)	Moderate (> 1-5 cm/yr)	With calcareous structures	Sessile	Teixido_2024
Schizoporella longicornis	Bryozoa	Active filter feeders with cilia	5 - 10 years	Colonial/Modular/Gregarious	Encrusting, encrusting leaf-like	No	Heterotroph	Very small (< 2 cm)	Moderate (> 1-5 cm/yr)	With calcareous structures	Sessile	Teixido_2024
Schizoporella sp.	Bryozoa	Active filter feeders with cilia	2 - 5 years	Colonial/Modular/Gregarious	Encrusting, encrusting leaf-like	No	Heterotroph	Very small (< 2 cm)	Moderate (> 1-5 cm/yr)	With calcareous structures	Sessile	Golo_2024
Scrupocellaria sp.	Bryozoa	Active filter feeders with cilia	< 1 - 1 year	Colonial/Modular/Gregarious	Articulated	No	Heterotroph	Small (2-5 cm)	Moderate (> 1-5 cm/yr)	With calcareous structures	Sessile	Teixido_2024
Serpula sp.	Annelida	Active filter feeders with cilia	2 - 5 years	Solitary	Encrusting, encrusting leaf-like	No	Heterotroph	Small (2-5 cm)	Slow (1 cm/yr)	With calcareous structures	Sessile	Teixido_2024
Siphonocladus pusillus	Chlorophyta	Autotroph	< 1 - 1 year	Solitary	Filamentous	No	Photosynthetic autotroph	Very small (< 2 cm)	Slow (1 cm/yr)	Without calcareous structure	Sessile	Galobart_2023
Smittina cervicornis	Bryozoa	Active filter feeders with cilia	2 - 5 years	Colonial/Modular/Gregarious	Massive erect	No	Heterotroph	Medium (5-20 cm)	Moderate (> 1-5 cm/yr)	With calcareous structures	Sessile	Teixido_2024
Spermothamnion flabellatum	Rhodophyta	Autotroph	< 1 - 1 year	Solitary	Filamentous	No	Photosynthetic autotroph	Very small (< 2 cm)	Moderate (> 1-5 cm/yr)	Without calcareous structure	Sessile	Galobart_2023
Sphacelaria cirrosa	Ochrophyta	Autotroph	< 1 - 1 year	Solitary	Filamentous	No	Photosynthetic autotroph	Very small (< 2 cm)	Slow (1 cm/yr)	Without calcareous structure	Sessile	Teixido_2024
Sphacelaria plumula	Ochrophyta	Autotroph	< 1 - 1 year	Solitary	Filamentous	No	Photosynthetic autotroph	Very small (< 2 cm)	Slow (1 cm/yr)	Without calcareous structure	Sessile	Golo_2024
Sphacelaria rigidula	Ochrophyta	Autotroph	< 1 - 1 year	Colonial/Modular/Gregarious	Articulated	No	Photosynthetic autotroph	Very small (< 2 cm)	Slow (1 cm/yr)	Without calcareous structure	Sessile	Galobart_2023
Sphaerechinus granularis	Echinodermata	Herbivores / Grazers	10 - 20 years	Solitary	Massive hemispheric	No	Heterotroph	Medium (5-20 cm)	Extreme slow (< 1 cm/yr)	With calcareous structures	Vagile	Current_Study
Spirastrella cunctatrix	Porifera	Active filter feeders by pumping	≥ 20 years	Colonial/Modular/Gregarious	Encrusting, encrusting leaf-like	No	Heterotroph	Very small (< 2 cm)	Slow (1 cm/yr)	Without calcareous structure	Sessile	Teixido_2024
Spirobranchus sp.	Annelida	Active filter feeders with cilia	2 - 5 years	Solitary	Encrusting, encrusting leaf-like	No	Heterotroph	Very small (< 2 cm)	Slow (1 cm/yr)	With calcareous structures	Sessile	Teixido_2024
Spirorbis sp.	Annelida	Active filter feeders with cilia	< 1 - 1 year	Colonial/Modular/Gregarious	Encrusting, encrusting leaf-like	No	Heterotroph	Very small (< 2 cm)	High (5-10 cm/yr)	With calcareous structures	Sessile	Teixido_2024
Spondylus gaederopus	Mollusca	Active filter feeders by pumping	5 - 10 years	Solitary	Massive encrusting	No	Heterotroph	Small (2-5 cm)	Moderate (> 1-5 cm/yr)	With calcareous structures	Sessile	Current_Study
Spongia lamella	Porifera	Active filter feeders by pumping	≥ 20 years	Colonial/Modular/Gregarious	Massive erect	No	Heterotroph	Large (20-50 cm)	Slow (1 cm/yr)	Without calcareous structure	Sessile	Current_Study
Spongia virgultosa	Porifera	Active filter feeders by pumping	5 - 10 years	Colonial/Modular/Gregarious	Encrusting, encrusting leaf-like	No	Heterotroph	Small (2-5 cm)	Slow (1 cm/yr)	Without calcareous structure	Sessile	Teixido_2024
Spongosorites intrincatus	Porifera	Active filter feeders by pumping	10 - 20 years	Colonial/Modular/Gregarious	Encrusting, encrusting leaf-like	No	Heterotroph	Very small (< 2 cm)	Moderate (> 1-5 cm/yr)	Without calcareous structure	Sessile	Gomez_Gras_2021
Spyridia filamentosa	Rhodophyta	Autotroph	< 1 - 1 year	Solitary	Filamentous	No	Photosynthetic autotroph	Small (2-5 cm)	Moderate (> 1-5 cm/yr)	Without calcareous structure	Sessile	Golo_2024
Stephanoscyphus sp.	Cnidaria	Passive filter feeders	2 - 5 years	Colonial/Modular/Gregarious	Stolonial	No	Heterotroph	Very small (< 2 cm)	Moderate (> 1-5 cm/yr)	Without calcareous structure	Sessile	Teixido_2024
Stilophora tenella	Ochrophyta	Autotroph	< 1 - 1 year	Solitary	Coarse branched	No	Photosynthetic autotroph	Medium (5-20 cm)	High (5-10 cm/yr)	Without calcareous structure	Sessile	Golo_2024
Sycon elegans	Porifera	Active filter feeders by pumping	< 1 - 1 year	Solitary	Cup-like	No	Heterotroph	Very small (< 2 cm)	Slow (1 cm/yr)	With calcareous structures	Sessile	Teixido_2024
Sycon raphanus	Porifera	Active filter feeders by pumping	< 1 - 1 year	Solitary	Cup-like	No	Heterotroph	Very small (< 2 cm)	Slow (1 cm/yr)	With calcareous structures	Sessile	Teixido_2024
Taonia atomaria	Ochrophyta	Autotroph	< 1 - 1 year	Solitary	Foliose-erect	No	Photosynthetic autotroph	Medium (5-20 cm)	High (5-10 cm/yr)	Without calcareous structure	Sessile	Teixido_2024
Tarantinaea lignaria	Mollusca	Carnivores	5 - 10 years	Solitary	Massive erect	No	Heterotroph	Small (2-5 cm)	Slow (1 cm/yr)	With calcareous structures	Vagile	Teixido_2024
Tedania anhelans	Porifera	Active filter feeders by pumping	10 - 20 years	Colonial/Modular/Gregarious	Massive erect	No	Photo-heterotroph	Medium (5-20 cm)	Slow (1 cm/yr)	Without calcareous structure	Sessile	Current_Study
Terpios gelatinosus	Porifera	Active filter feeders by pumping	5 - 10 years	Colonial/Modular/Gregarious	Encrusting, encrusting leaf-like	No	Heterotroph	Very small (< 2 cm)	Slow (1 cm/yr)	Without calcareous structure	Sessile	Teixido_2024
Tethya aurantium	Porifera	Active filter feeders by pumping	10 - 20 years	Colonial/Modular/Gregarious	Massive hemispheric	No	Heterotroph	Medium (5-20 cm)	Moderate (> 1-5 cm/yr)	Without calcareous structure	Sessile	Teixido_2024
Thais haemastoma	Mollusca	Carnivores	5 - 10 years	Solitary	Massive erect	No	Heterotroph	Small (2-5 cm)	Moderate (> 1-5 cm/yr)	With calcareous structures	Vagile	Teixido_2024
Thuridilla hopei	Mollusca	Carnivores	< 1 - 1 year	Solitary	Encrusting, encrusting leaf-like	No	Heterotroph	Very small (< 2 cm)	Slow (1 cm/yr)	Without calcareous structure	Vagile	Teixido_2024
Thylacodes arenarius	Mollusca	Active filter feeders with cilia	5 - 10 years	Solitary	Massive erect	No	Heterotroph	Small (2-5 cm)	Moderate (> 1-5 cm/yr)	With calcareous structures	Sessile	Teixido_2024
Tricleocarpa cylindrica	Rhodophyta	Autotroph	< 1 - 1 year	Solitary	Articulated	No	Photosynthetic autotroph	Small (2-5 cm)	Moderate (> 1-5 cm/yr)	With calcareous structures	Sessile	Teixido_2024
Turbicellepora avicularis	Bryozoa	Active filter feeders with cilia	10 - 20 years	Colonial/Modular/Gregarious	Tree-like	No	Heterotroph	Small (2-5 cm)	Moderate (> 1-5 cm/yr)	With calcareous structures	Sessile	Current_Study
Turf	Turf	Autotroph	< 1 - 1 year	Colonial/Modular/Gregarious	Filamentous	No	Photosynthetic autotroph	Very small (< 2 cm)	High (5-10 cm/yr)	Without calcareous structure	Sessile	Teixido_2024
Valonia macrophysa	Chlorophyta	Autotroph	2 - 5 years	Colonial/Modular/Gregarious	Massive hemispheric	No	Photosynthetic autotroph	Small (2-5 cm)	Moderate (> 1-5 cm/yr)	Without calcareous structure	Sessile	Galobart_2023
Valonia sp.	Chlorophyta	Autotroph	2 - 5 years	Solitary	Massive hemispheric	No	Photosynthetic autotroph	Small (2-5 cm)	Moderate (> 1-5 cm/yr)	Without calcareous structure	Sessile	Golo_2024
Valonia utricularis	Chlorophyta	Autotroph	2 - 5 years	Colonial/Modular/Gregarious	Massive hemispheric	No	Photosynthetic autotroph	Small (2-5 cm)	Moderate (> 1-5 cm/yr)	Without calcareous structure	Sessile	Teixido_2024
Vertebrata reptabunda	Rhodophyta	Autotroph	< 1 - 1 year	Colonial/Modular/Gregarious	Filamentous	No	Photosynthetic autotroph	Very small (< 2 cm)	Slow (1 cm/yr)	Without calcareous structure	Sessile	Galobart_2023
Vertebrata subulifera	Rhodophyta	Autotroph	2 - 5 years	Solitary	Filamentous	No	Photosynthetic autotroph	Medium (5-20 cm)	High (5-10 cm/yr)	Without calcareous structure	Sessile	Galobart_2023
Watersipora subovoidea	Bryozoa	Active filter feeders with cilia	< 1 - 1 year	Colonial/Modular/Gregarious	Encrusting, encrusting leaf-like	No	Heterotroph	Very small (< 2 cm)	Moderate (> 1-5 cm/yr)	With calcareous structures	Sessile	Teixido_2024
Womersleyella setacea	Rhodophyta	Autotroph	< 1 - 1 year	Colonial/Modular/Gregarious	Filamentous	No	Photosynthetic autotroph	Very small (< 2 cm)	Moderate (> 1-5 cm/yr)	Without calcareous structure	Sessile	Teixido_2024
Wrangelia penicillata	Rhodophyta	Autotroph	< 1 - 1 year	Solitary	Filamentous	No	Photosynthetic autotroph	Small (2-5 cm)	Moderate (> 1-5 cm/yr)	Without calcareous structure	Sessile	Teixido_2024
Wurdemannia miniata	Rhodophyta	Autotroph	< 1 - 1 year	Solitary	Coarse branched	No	Photosynthetic autotroph	Small (2-5 cm)	Moderate (> 1-5 cm/yr)	Without calcareous structure	Sessile	Golo_2024
Zanardinia typus	Ochrophyta	Autotroph	2 - 5 years	Solitary	Encrusting, encrusting leaf-like	No	Photosynthetic autotroph	Very small (< 2 cm)	Moderate (> 1-5 cm/yr)	Without calcareous structure	Sessile	Teixido_2024
